# Supplementary material for: Establishment, Validation, and Initial Application of a Sensitive LC-MS/MS Assay for Quantification of the Naturally Occurring Isomers Itaconate, Mesaconate, and Citraconate
Source: MDPI journal article supplement (doi:10.3390/metabo11050270), 2021-04-26
Supplement: s1 [file s1]

Supporting Information

Figures

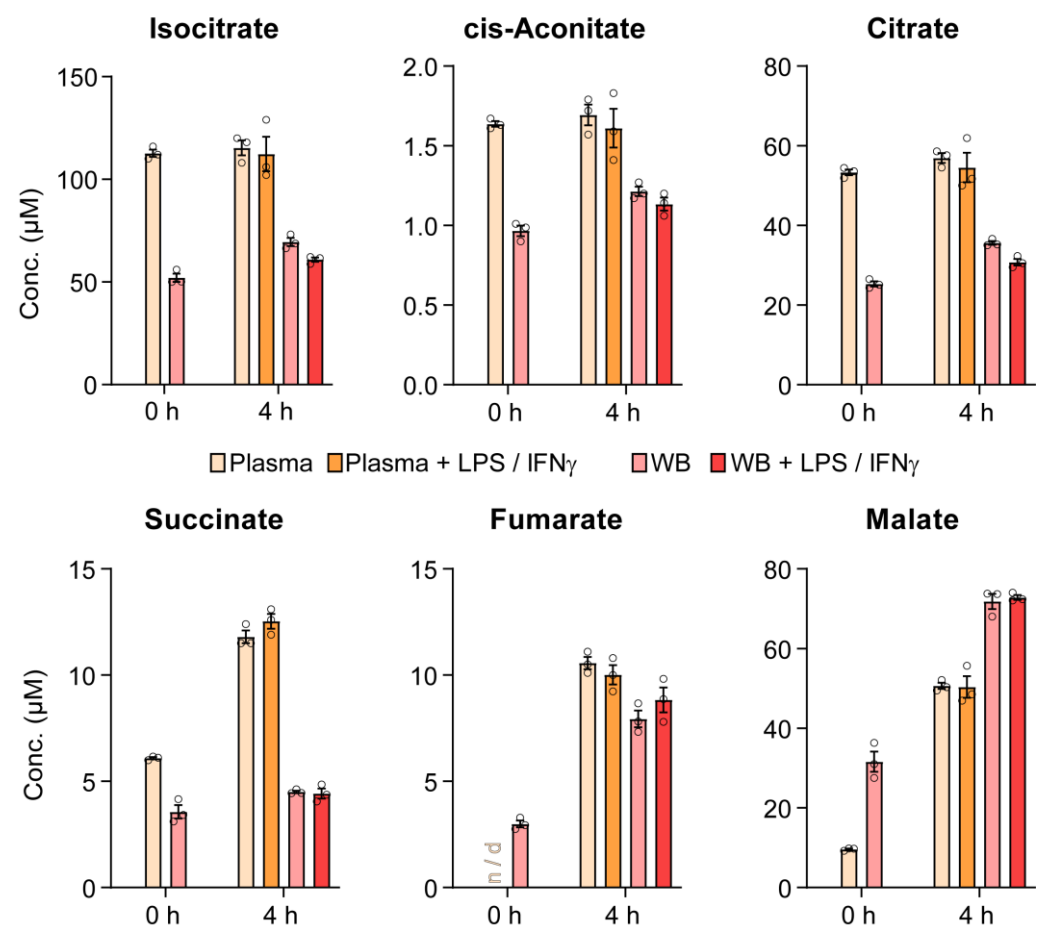

**Figure S1.** TCA metabolite levels in LPS/ $\text{IFN}\gamma$  stimulated whole blood (WB) and plasma from the experiment shown in Figure 2A;  $n=3$ ; mean  $\pm$  SEM; values  $<$  LLOQ were considered missing values. Lactate levels were  $>$  ULOQ. n/d = not detected.

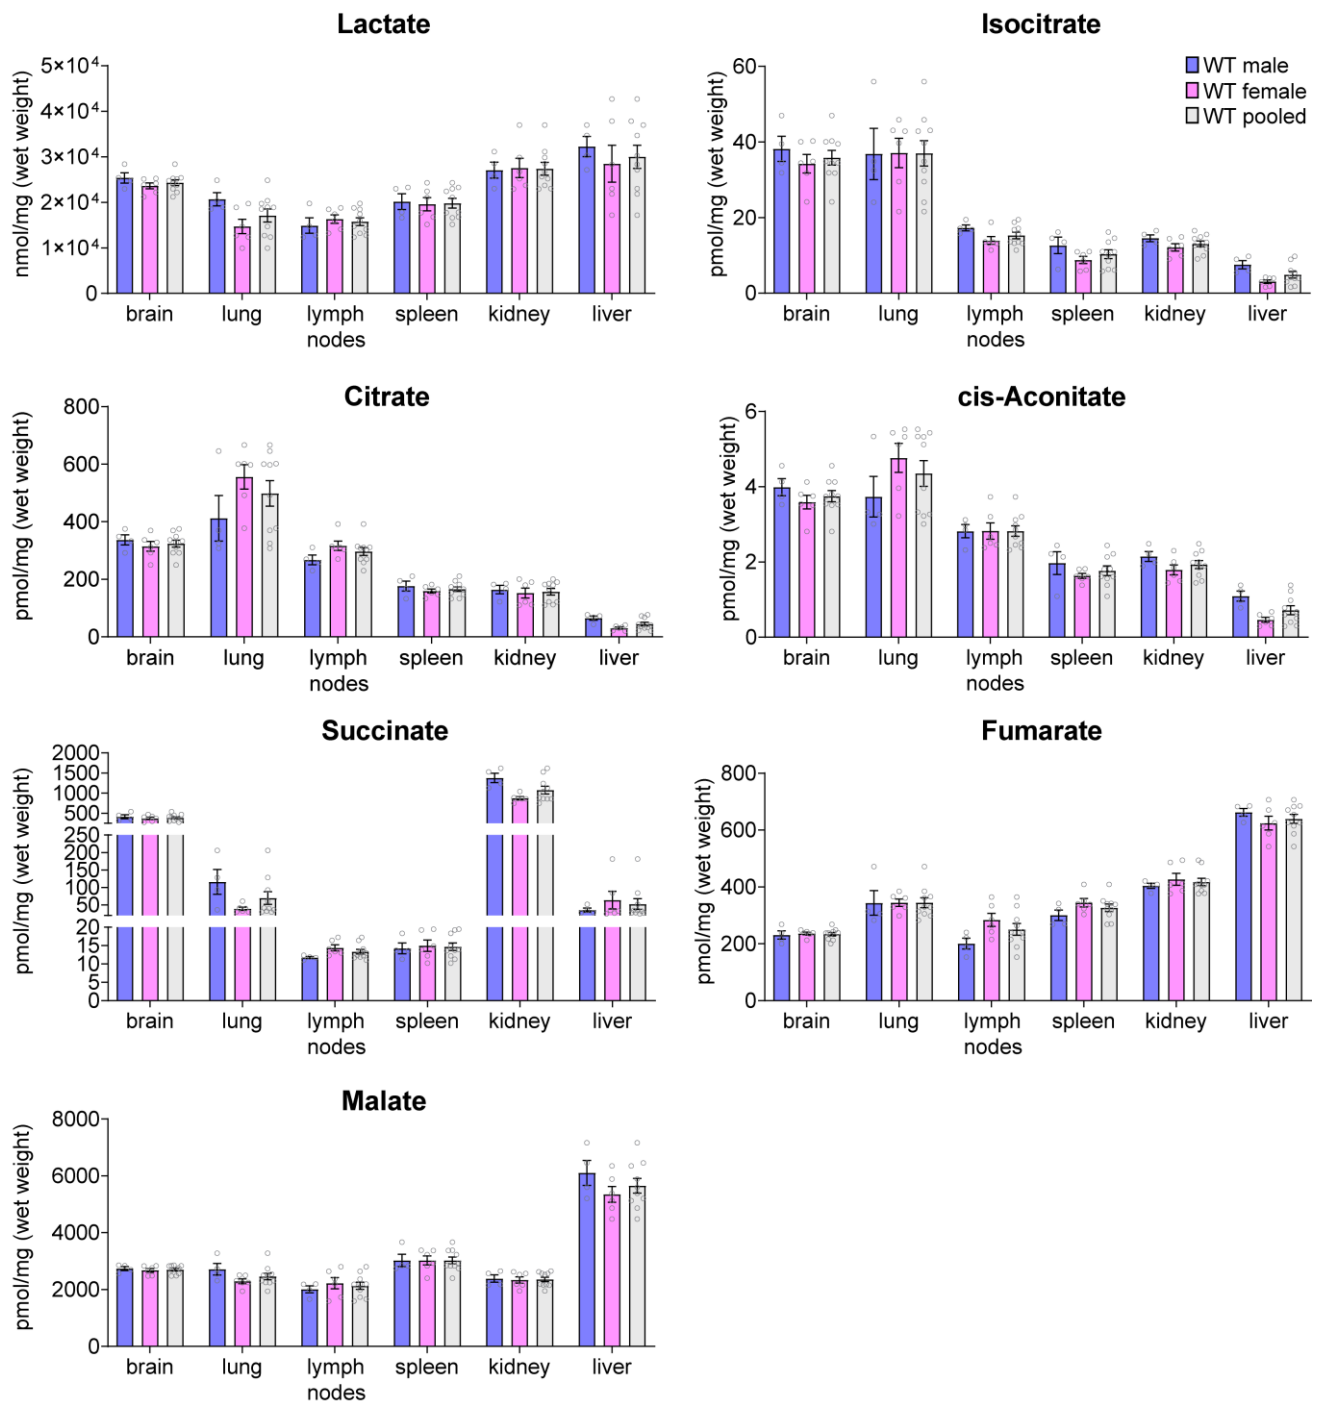

**Figure S2.** TCA metabolite levels in mouse organs in extracted mouse organs of 44 to 46 weeks old C57BL/6J mice from the experiment shown in Figure 3;  $n = 4$  male and  $n = 6$  female mice, mean  $\pm$  SEM; values  $<$  LLOQ were considered missing values.

## Tables

**Table S1.** Summary of studies on itaconate quantification in diseases and disease models.

| Reference     | Host                             | Disease/Model                               | Biosample                                                                                                                                   | Method     | Reported LLOQ      |
|---------------|----------------------------------|---------------------------------------------|---------------------------------------------------------------------------------------------------------------------------------------------|------------|--------------------|
| <b>Human</b>  |                                  |                                             |                                                                                                                                             |            |                    |
| [52]          | Human                            | Sepsis                                      | Serum                                                                                                                                       | GC-MS      | 0.5 $\mu$ M        |
| [15]          | Human                            | Systemic lupus erythematosus                | Serum                                                                                                                                       | HPLC-MS    | –                  |
| [16]          | Human<br>Aging female population | Overactive bladder syndrome                 | Urine                                                                                                                                       | GC-MS      | –                  |
| [17]          | Human                            | Sepsis                                      | Plasma, serum, broncho-alveolar lavage fluid, urine                                                                                         | GC-MS      | 1 $\mu$ M (plasma) |
| [53]          | Human                            | Gestational diabetes mellitus               | Maternal serum at 20 weeks' gestation                                                                                                       | GC-MS      | –                  |
| <b>Animal</b> |                                  |                                             |                                                                                                                                             |            |                    |
| [54]          | Mouse                            | <i>P. aeruginosa</i> infection              | Broncho-alveolar lavage                                                                                                                     | LC-MS      | –                  |
| [13]          | Chicken                          | <i>Eimeria acervulina</i> infection         | Serum                                                                                                                                       | UPLC-MS/MS | –                  |
| [55]          | Mussel                           | <i>Vibrio</i> sp. infection                 | Tissue                                                                                                                                      | GC-MS      | 6.25 $\mu$ M       |
| [12]          | Mussel                           | <i>Vibrio</i> sp. infection                 | Tissue                                                                                                                                      | GC-MS      | –                  |
| [56]          | Rat                              | Chronic fatigue syndrome (CFS)              | Serum, urine                                                                                                                                | GC-MS      | –                  |
| [57]          | Mouse                            | Peritoneal tumors                           | Peritoneal macrophages                                                                                                                      | GC-TOF     | –                  |
| [14]          | Mouse                            | Rheumatoid arthritis                        | Hind limb extract, cell lysates (mouse synovial fibroblast culture), K4IM cells (human synovial fibroblast cell line culture), serum, urine | LC-MS/MS   | –                  |
| [29]          | Mouse                            | <i>Salmonella typhimurium</i> infection     | Urine, serum, intestine, liver, spleen                                                                                                      | NMR        | –                  |
| [28]          | Mouse                            | <i>Mycobacterium tuberculosis</i> infection | Lung                                                                                                                                        | NMR        | –                  |

**Table S2.** Summary of studies on mesaconate quantification in diseases and disease models.

| Reference     | Host  | Disease/Model                                                                                                   | Biosample      | Method                       | Reported LLOQ |
|---------------|-------|-----------------------------------------------------------------------------------------------------------------|----------------|------------------------------|---------------|
| <b>Human</b>  |       |                                                                                                                 |                |                              |               |
| [58]          | Human | Metabolomic changes following marathon (negative correlation with testosterone)                                 | Serum          | UHPLC-Q-TOF/MS and GC-TOF/MS | –             |
| [23]          | Human | Isovaleric acidemia                                                                                             | Urine          | GC-MS                        | –             |
| [24]          | Human | Squalene synthase deficiency (defect in cholesterol biosynthesis; mesaconate is product of farnesol catabolism) | Urine          | GC-MS                        | –             |
| [59]          | Human | IgA nephropathy                                                                                                 | Urine          | NMR                          | –             |
| [60]          | Human | Peritoneal dialysis patients with anemia/ intra-venous iron therapy                                             | Serum          | LC-MS                        | –             |
| [61]          | Human | Schizophrenia (mesaconate detected in healthy controls only)                                                    | Serum          | NMR                          | –             |
| [62]          | Human | Treatment with sodium benzoate                                                                                  | Urine          | GC                           | –             |
| [63]          | Human | Isovaleric academia, during a severe ketoacidotic attack                                                        | Urine          | GC-MS                        | –             |
| [64]          | Human | Isovaleric acidemia                                                                                             | Urine          | Headspace- GC                | –             |
| [65]          | Human | Fasting and diabetic ketoacidosis (also citraconic acid)                                                        | Urine          | GC                           | –             |
| [66]          | Human | Prenatal diagnosis of methylmalonic academia / isovaleric academia                                              | Urine<br>Serum | GC                           | –             |
| <b>Animal</b> |       |                                                                                                                 |                |                              |               |
| [67]          | Mice  | Lung injury caused by paraquat                                                                                  | Lung tissues   | LC-MS/MS                     | –             |
| [68]          | Rat   | Feeding study methylsuccinate (rat)                                                                             | Urine          | GS-MS                        | –             |

**Table S3.** Summary of studies on citraconate quantification in diseases and disease models.

| Reference    | Host          | Disease/Model                                                                                                    | Biosample                           | Method                     | Reported LLOQ |
|--------------|---------------|------------------------------------------------------------------------------------------------------------------|-------------------------------------|----------------------------|---------------|
| <b>Human</b> |               |                                                                                                                  |                                     |                            |               |
| [69]         | Human         | <i>Porphyromonas gingivalis</i> infection in periodontal ligament cells (PDLSCs)                                 | Periodontal ligament cells (PDLSCs) | GC-MS                      | –             |
| [70]         | Human<br>Mice | Extracellular magnesium deficiency                                                                               | HepG2<br>RAW264.7<br>HUVECs         | GC-MS                      | –             |
| [20]         | Human         | Type 2 diabetes mellitus                                                                                         | Serum                               | GC/TOF-MS                  | –             |
| [21]         | Human         | Polychlorinated biphenyls (PCB) exposure in maternal and cord serum                                              | Serum (cord blood)                  | HILIC-MS/MS<br>GC-NICI-qMS | –             |
| [22]         | Human         | Cirrhosis due to viral hepatitis vs. primary biliary cholangitis                                                 | Serum                               | NMR                        | –             |
| [19]         | Human         | Colorectal cancer                                                                                                | Serum                               | LC-MS/MS                   | –             |
| [18]         | Human         | Methylmalonyl-CoA mutase deficiency (deranged isoleucine metabolism / ketotic attacks / methylmalonic acidaemia) | Urine                               | GC-MS                      | –             |

**Table S4.** Implementation of FDA recommendations for chromatographic assay validation.

| FDA Validation Recommendations for Chromatographic Assays (CCs) |                                                                                                                                                                                                                                                                                                                                                                                                                              | Implementation for Assay Validation                                                                                                                                                                                                                                                                                                                                                                                                                                                                                                                                                                                                                  |
|-----------------------------------------------------------------|------------------------------------------------------------------------------------------------------------------------------------------------------------------------------------------------------------------------------------------------------------------------------------------------------------------------------------------------------------------------------------------------------------------------------|------------------------------------------------------------------------------------------------------------------------------------------------------------------------------------------------------------------------------------------------------------------------------------------------------------------------------------------------------------------------------------------------------------------------------------------------------------------------------------------------------------------------------------------------------------------------------------------------------------------------------------------------------|
| Parameter                                                       | Elements                                                                                                                                                                                                                                                                                                                                                                                                                     |                                                                                                                                                                                                                                                                                                                                                                                                                                                                                                                                                                                                                                                      |
| Calibration Curve                                               | <ul style="list-style-type: none"> <li>- A blank (no analyte, no ISTD), a zero calibrator (blank plus ISTD), and at least six non-zero calibrator levels covering the quantitation range, including LLOQ in every run.</li> <li>- All blanks and calibrators should be in the same matrix as the study samples.</li> <li>- The concentration-response relationship should fit with the simplest regression model.</li> </ul> | <ul style="list-style-type: none"> <li>- 11 calibrator levels for Citraconate, Itaconate, Mesaconate &amp; cis-Aconitate, 6-10 for the remaining analytes (<b>Table S6</b>).</li> <li>- A surrogate matrix of PBS with 50 mg/ml HSA was used, due to the ubiquitous presence of TCA metabolites in most samples.</li> <li>- the concentration-response relationship was fit with quadratic regression and 1/x weighting.</li> </ul>                                                                                                                                                                                                                  |
| Quality Controls (QC)                                           | <ul style="list-style-type: none"> <li>- For A &amp; P Runs: Four QCs, including LLOQ, low (L: defined as three times the LLOQ), mid M: defined as mid-range), and high (H: defined as high-range) from at least five replicates in at least three runs</li> <li>- For other validation runs: L, M, andh QCs in duplicates</li> </ul>                                                                                        | <ul style="list-style-type: none"> <li>- Three QCs were included (L, M &amp; H; <b>Table 1</b>) with at least five replicates for all validation runs.</li> </ul>                                                                                                                                                                                                                                                                                                                                                                                                                                                                                    |
| Selectivity                                                     | <ul style="list-style-type: none"> <li>- Analyze blank samples of the appropriate biological matrix from at least six individual sources.</li> </ul>                                                                                                                                                                                                                                                                         | <ul style="list-style-type: none"> <li>- Base level concentrations of Itaconate isomers and TCA metabolites were analyzed in unspiked plasma and whole blood samples (<b>Table S13</b>).</li> </ul>                                                                                                                                                                                                                                                                                                                                                                                                                                                  |
| Specificity                                                     | <ul style="list-style-type: none"> <li>- The method specificity should be assessed for interference by cross-reacting molecules, concomitant medications, bio-transformed species, etc.</li> </ul>                                                                                                                                                                                                                           | <ul style="list-style-type: none"> <li>- All analytes were spiked in plasma and whole blood samples (base level concentrations in <b>Table S13</b>) at three QC concentrations (L, M &amp; H; <b>Table S14/S15</b> for Itaconate isomers; <b>Table S16/S17</b> for TCA metabolites).</li> </ul>                                                                                                                                                                                                                                                                                                                                                      |
| Carryover                                                       | <ul style="list-style-type: none"> <li>- The impact of carryover on the accuracy of the study sample concentrations should be assessed.</li> </ul>                                                                                                                                                                                                                                                                           | <ul style="list-style-type: none"> <li>- Carryover was monitored for each analyte in double blanks (HPLC grade water) following QC-H samples during HPLC-MS/MS sample analyses (measured in n=10 different batches; <b>Table 1</b>).</li> </ul>                                                                                                                                                                                                                                                                                                                                                                                                      |
| Sensitivity                                                     | <ul style="list-style-type: none"> <li>- The lowest nonzero standard on the calibration curve defines the sensitivity (LLOQ).</li> </ul>                                                                                                                                                                                                                                                                                     | <ul style="list-style-type: none"> <li>- LLOQ (<b>Table S6</b>) was defined as five times the analyte response of the matrix blank according to recommendations.</li> </ul>                                                                                                                                                                                                                                                                                                                                                                                                                                                                          |
| Accuracy and Precision (A & P)                                  | <ul style="list-style-type: none"> <li>- A &amp; P should be established with at least three independent A &amp; P runs, four QC levels per run (LLOQ, L, M,h QC), and <math>\geq</math> five replicates per QC level.</li> </ul>                                                                                                                                                                                            | <ul style="list-style-type: none"> <li>- A &amp; P was established for intra-, interday and operator A &amp; P runs (<b>Table 1</b>), three QC levels (L, M &amp; H) per run and <math>\geq 5</math> (up to 10) replicates per QC level.</li> </ul>                                                                                                                                                                                                                                                                                                                                                                                                  |
| Recovery                                                        | <ul style="list-style-type: none"> <li>- Extracted samples at L, M, andh QC concentrations versus extracts of blanks spiked with the analyte post extraction (at L, M, and H).</li> </ul>                                                                                                                                                                                                                                    | <ul style="list-style-type: none"> <li>- Recovery experiment was performed with five replicates per QC level (L, M &amp; H; <b>Table 1</b>).</li> </ul>                                                                                                                                                                                                                                                                                                                                                                                                                                                                                              |
| Stability                                                       | <ul style="list-style-type: none"> <li>- For auto-sampler, bench-top, extract, freeze-thaw, stock solution and long-term stability, perform at least three replicates at L andh QC concentrations.</li> </ul>                                                                                                                                                                                                                | <ul style="list-style-type: none"> <li>- Each stability test was performed with five replicates, three QC levels (L, M &amp; H) and up to four timepoints: <ul style="list-style-type: none"> <li>- Auto-sampler (<b>Table 1</b>),</li> <li>- Bench-top (1-7 days at RT, <b>Table S7</b>)</li> <li>- Fridge (1-21 days at 4 °C, <b>Table S8</b>)</li> <li>- Extract (1-35 days in extraction solvent at -20 °C/-80 °C, <b>Table S9</b> &amp; 1-21 days as dried extracts at RT, <b>Table S10</b>)</li> <li>- Freeze/thaw (4 cycles, <b>Table S11</b>)</li> <li>- Long-term stability (1-6 months at -20 °C, <b>Table S12</b>)</li> </ul> </li> </ul> |
| Dilution                                                        | <ul style="list-style-type: none"> <li>- QCs for planned dilutions, five replicates per dilution factor.</li> </ul>                                                                                                                                                                                                                                                                                                          | <ul style="list-style-type: none"> <li>- A &amp; P of 1/10 diluted QC-H were analyzed for five replicates (<b>Table S18</b>).</li> </ul>                                                                                                                                                                                                                                                                                                                                                                                                                                                                                                             |
| Repeat Analysis                                                 | <ul style="list-style-type: none"> <li>- No re-analysis of individual calibrators and QCs is permitted.</li> </ul>                                                                                                                                                                                                                                                                                                           | <ul style="list-style-type: none"> <li>- Samples were only reanalyzed to assess autosampler stability (<b>Table 1</b>).</li> </ul>                                                                                                                                                                                                                                                                                                                                                                                                                                                                                                                   |

**Table S5.** Mass spectrometry parameters and HPLC retention times.

| Analyte                                       | Q1 Mass<br>(Da) | Q3 Mass<br>(Da) | Dwell<br>Time<br>(msec) | DP<br>(volts) | CE<br>(volts) | CXP<br>(volts) | Retention<br>Time<br>(min) |
|-----------------------------------------------|-----------------|-----------------|-------------------------|---------------|---------------|----------------|----------------------------|
| <sup>13</sup> C <sub>5</sub> -Itaconate_Q     | 134.017         | 88.900          | 30                      | -25           | -14           | -5             | 6.75                       |
| <sup>13</sup> C <sub>5</sub> -Itaconate_2     | 134.017         | 44.100          | 30                      | -25           | -22           | -1             |                            |
| Itaconate/Citraconate_Q                       | 128.859         | 85.000          | 30                      | -30           | -14           | -7             | Citra: 4.60                |
| Itaconate/Citraconate_2                       | 129.017         | 41.100          | 30                      | -25           | -22           | -1             | Ita: 6.75                  |
| Mesaconate_Q                                  | 128.856         | 84.900          | 30                      | -30           | -10           | -9             | 5.85                       |
| 4-Octyl-itaconate-1                           | 240.949         | 111.000         | 30                      | -35           | -18           | -7             | 8.94                       |
| 4-Octyl-itaconate_Q                           | 240.949         | 66.900          | 30                      | -35           | -30           | -5             |                            |
| <sup>13</sup> C <sub>6</sub> -cis-Aconitate_Q | 178.870         | 134.000         | 30                      | -30           | -12           | -7             | 3.02                       |
| <sup>13</sup> C <sub>6</sub> -cis-Aconitate_2 | 178.870         | 115.900         | 30                      | -30           | -12           | -9             |                            |
| cis-Aconitate_Q                               | 172.938         | 85.051          | 30                      | -30           | -16           | -7             | 3.02                       |
| cis-Aconitate_2                               | 172.938         | 110.878         | 30                      | -30           | -12           | -9             |                            |
| <sup>13</sup> C <sub>2</sub> -Citrate_Q       | 192.909         | 112.951         | 30                      | -35           | -18           | -7             | 2.40                       |
| <sup>13</sup> C <sub>2</sub> -Citrate_2       | 192.909         | 87.958          | 30                      | -35           | -24           | -5             |                            |
| Citrate_Q                                     | 190.886         | 110.984         | 30                      | -30           | -18           | -7             | 2.40                       |
| Citrate_2                                     | 190.886         | 86.968          | 30                      | -30           | -22           | -9             |                            |
| Fumarate_Q                                    | 114.820         | 71.000          | 30                      | -45           | -10           | -7             | 2.78                       |
| Isocitrate_Q                                  | 190.909         | 110.832         | 30                      | -30           | -20           | -9             | 1.54                       |
| Isocitrate_2                                  | 190.909         | 73.019          | 30                      | -30           | -30           | -5             |                            |
| <sup>13</sup> C <sub>3</sub> -Lactate_Q       | 91.829          | 45.000          | 30                      | -100          | -16           | -5             | 1.76                       |
| <sup>13</sup> C <sub>3</sub> -Lactate_2       | 91.829          | 43.000          | 30                      | -70           | -34           | -5             |                            |
| Lactate_Q                                     | 88.890          | 43.096          | 30                      | -40           | -18           | -1             | 1.76                       |
| Lactate_2                                     | 88.890          | 45.018          | 30                      | -40           | -16           | -1             |                            |
| Malate_Q                                      | 132.855         | 114.864         | 30                      | -30           | -16           | -7             | 1.49                       |
| Malate_2                                      | 132.855         | 70.931          | 30                      | -30           | -22           | -3             |                            |
| <sup>13</sup> C <sub>4</sub> -Succinate_Q     | 121.000         | 76.000          | 30                      | -35           | -16           | -7             | 2.78                       |
| <sup>13</sup> C <sub>4</sub> -Succinate_2     | 121.000         | 103.000         | 30                      | -35           | -14           | -7             |                            |
| Succinate_Q                                   | 116.847         | 73.000          | 30                      | -30           | -16           | -7             | 2.78                       |
| Succinate_2                                   | 116.847         | 99.000          | 30                      | -30           | -14           | -7             |                            |

DP, declustering potential; CE, collision energy; CXP, collision cell exit potential; Q, quantifier mass transition generally used for quantification.

**Table S6.** Limits of quantification for the HPLC-MS/MS assay.

| Analyte           | Internal Standard                                                                   | Average LOD (μM) | Average LLOQ (Calibrator) (μM) | Average LLOQ per Sample (pmol) | Average LLOQ on Column (pmol) | Average LLOQ on Column (pg) | Average ULOQ (Calibrator) (μM) | Average R <sup>2</sup> | Molar Mass (g/mol) |
|-------------------|-------------------------------------------------------------------------------------|------------------|--------------------------------|--------------------------------|-------------------------------|-----------------------------|--------------------------------|------------------------|--------------------|
| Itaconate         | <sup>13</sup> C <sub>5</sub> -Itaconate                                             | 0.049            | 0.098 (C1)                     | 4.90                           | 0.490                         | 64                          | 100 (C11)                      | 0.9999                 | 130.099            |
| Citraconate       | <sup>13</sup> C <sub>5</sub> -Itaconate                                             | 0.025            | 0.049 (C1)                     | 2.45                           | 0.245                         | 32                          | 50 (C11)                       | 0.9999                 | 130.099            |
| Mesaconate        | <sup>13</sup> C <sub>5</sub> -Itaconate                                             | 0.049            | 0.098 (C1)                     | 4.90                           | 0.490                         | 64                          | 100 (C11)                      | 0.9999                 | 130.099            |
| 4-Octyl-itaconate | <sup>13</sup> C <sub>5</sub> -Itaconate                                             | 0.003            | 0.020 (C3)                     | 1.00                           | 0.100                         | 24                          | 5 (C11)                        | 0.9999                 | 242.312            |
| cis-Aconitate     | <sup>13</sup> C <sub>6</sub> -cis-Aconitate                                         | 0.025            | 0.049 (C1)                     | 2.45                           | 0.245                         | 43                          | 50 (C11)                       | 1.0000                 | 174.109            |
| Citrate           | <sup>13</sup> C <sub>2</sub> -Citrate                                               | (0.195)*         | 0.391 (C5)                     | 19.55                          | 1.955                         | 376                         | 25 (C11)                       | 0.9998                 | 192.124            |
| Fumarate          | ( <sup>13</sup> C <sub>2</sub> -Citrate)<br><sup>13</sup> C <sub>4</sub> -Succinate | 0.780            | 1.560 (C6)                     | 78.00                          | 7.800                         | 905                         | 50 (C11)                       | 1.0000                 | 116.072            |
| Isocitrate        | <sup>13</sup> C <sub>3</sub> -Lactate                                               | 0.012            | 0.098 (C2)                     | 4.90                           | 0.490                         | 94                          | 50 (C11)                       | 0.9999                 | 192.124            |
| Lactate           | <sup>13</sup> C <sub>3</sub> -Lactate                                               | (7.8-15.6)*      | 31.300 (C7)                    | 1565.00                        | 156.500                       | 14097                       | 500 (C11)                      | 0.9998                 | 90.078             |
| Malate            | <sup>13</sup> C <sub>3</sub> -Lactate                                               | 0.049            | 0.196 (C3)                     | 9.80                           | 0.980                         | 131                         | 50 (C11)                       | 0.9999                 | 134.088            |
| Succinate         | ( <sup>13</sup> C <sub>2</sub> -Citrate)<br><sup>13</sup> C <sub>4</sub> -Succinate | (0.391)*         | 0.781 (C5)                     | 39.05                          | 3.905                         | 461                         | 50 (C11)                       | 0.9998                 | 118.088            |

Calibrators range from C0 (matrix blank) to C11; LOD: limit of detection; LLOQ and ULOQ: lower and upper limit of quantification; R<sup>2</sup> of quadratic regression with 1/x weighting. \*Due to residual impurities in the surrogate matrix, the LOD for these analytes is specified as > 3× the signal (peak area) of the matrix blank.



**Table S7.** Stability of quality controls in surrogate matrix at room temperature (bench-top).

| QCs in Surrogate Matrix at RT for | Exp. Conc.<br>( $\mu$ M) | Mean<br>( $\mu$ M) | Accuracy<br>(%) | Precision<br>(%CV) | Mean<br>( $\mu$ M) | Accuracy<br>(%) | Precision<br>(%CV) | Mean<br>( $\mu$ M) | Accuracy<br>(%) | Precision<br>(%CV) |
|-----------------------------------|--------------------------|--------------------|-----------------|--------------------|--------------------|-----------------|--------------------|--------------------|-----------------|--------------------|
|                                   |                          | 1 day              |                 |                    | 3 days             |                 |                    | 1 week             |                 |                    |
| Itaconate                         | 0.3                      | 0.3                | 104.1           | 1.9                | 0.3                | 102.7           | 1.3                | 0.3                | 103.0           | 2.9                |
|                                   | 3                        | 3.2                | 105.8           | 1.4                | 3.2                | 106.1           | 0.7                | 3.2                | 106.8           | 1.8                |
|                                   | 80                       | 73.3               | 91.6            | 1.6                | 74.7               | 93.3            | 2.0                | 80.9               | 101.1           | 3.5                |
| Citraconate                       | 0.15                     | 0.2                | 109.5           | 3.0                | 0.2                | 109.7           | 2.2                | 0.2                | <u>111.2</u>    | 2.6                |
|                                   | 3                        | 3.2                | 105.7           | 1.8                | 3.2                | 105.4           | 1.2                | 3.2                | 106.9           | 1.5                |
|                                   | 40                       | 39.3               | 98.2            | 1.5                | 39.5               | 98.8            | 1.6                | 41.6               | 104.1           | 2.4                |
| Mesaconate                        | 0.3                      | 0.3                | 101.5           | 2.7                | 0.3                | 101.5           | 2.1                | 0.3                | 100.8           | 4.2                |
|                                   | 3                        | 3.3                | 109.3           | 1.0                | 3.3                | 109.4           | 0.5                | 3.3                | <u>110.7</u>    | 3.0                |
|                                   | 80                       | 78.8               | 98.5            | 1.4                | 79.3               | 99.2            | 1.7                | 82.5               | 103.2           | 2.3                |
| 4-Octyl-itaconate                 | 0.03                     | 0.03               | <u>86.1</u>     | 7.3                | 0.03               | 90.9            | 10.2               | 0.03               | 95.5            | 8.3                |
|                                   | 0.3                      | 0.3                | 101.3           | 5.0                | 0.3                | 101.1           | 2.4                | 0.3                | 106.5           | 4.1                |
|                                   | 2                        | 1.8                | 91.4            | 1.5                | 1.8                | 91.0            | 1.0                | 1.9                | 94.6            | 2.3                |
| cis-Aconitate                     | 0.15                     | 0.1                | 91.5            | 4.7                | 0.1                | 93.9            | 7.0                | 0.1                | 92.9            | 4.1                |
|                                   | 3                        | 2.9                | 96.7            | 1.7                | 2.9                | 96.9            | 0.9                | 2.9                | 96.7            | 2.0                |
|                                   | 40                       | 37.7               | 94.3            | 1.5                | 37.9               | 94.8            | 1.4                | 39.9               | 99.8            | 1.3                |
| Citrate                           | 1.2                      | 1.3                | 107.2           | 1.7                | 1.3                | 105.3           | 1.2                | 1.3                | 104.3           | 1.9                |
|                                   | 6                        | 6.4                | 105.9           | 1.2                | 6.4                | 106.5           | 5.0                | 6.3                | 104.6           | 1.0                |
|                                   | 20                       | 19.8               | 99.0            | 2.2                | 19.6               | 98.0            | 1.7                | 20.1               | 100.7           | 1.2                |
| Fumarate                          | 5                        | 5.1                | 102.6           | 1.2                | 5.2                | 103.0           | 1.3                | 5.3                | 106.1           | 1.4                |
|                                   | 12                       | 12.6               | 104.7           | 4.2                | 12.8               | 106.5           | 2.8                | 13.3               | <u>111.2</u>    | 2.0                |
|                                   | 40                       | 35.6               | <u>89.1</u>     | 2.6                | 37.0               | 92.5            | 2.2                | 41.9               | 104.7           | 5.7                |
| Isocitrate                        | 0.6                      | 0.7                | <u>115.2</u>    | 3.2                | 0.7                | 109.4           | 1.3                | 0.6                | 101.0           | 2.0                |
|                                   | 6                        | 7.3                | <u>122.4</u>    | 2.9                | 7.1                | <u>117.6</u>    | 2.8                | 6.6                | <u>110.4</u>    | 1.7                |
|                                   | 40                       | 43.3               | 108.3           | 1.4                | 42.9               | 107.2           | 2.1                | 40.9               | 102.3           | 3.8                |
| Lactate                           | 50                       | 48.7               | 97.4            | 8.3                | 47.6               | 95.1            | 2.3                | 50.1               | 100.2           | 4.0                |
|                                   | 150                      | 159.2              | 106.1           | 2.1                | 160.0              | 106.7           | 1.7                | 167.8              | <u>111.9</u>    | 3.2                |
|                                   | 400                      | 409.0              | 102.3           | 0.9                | 413.0              | 103.3           | 1.6                | 423.2              | 105.8           | 1.8                |
| Malate                            | 0.6                      | 0.7                | <u>117.6</u>    | 3.8                | 0.7                | <u>114.2</u>    | 3.0                | 0.7                | 108.6           | 2.1                |
|                                   | 6                        | 7.2                | <u>119.2</u>    | 3.2                | 7.1                | <u>117.6</u>    | 3.0                | 6.9                | <u>115.0</u>    | 5.7                |
|                                   | 40                       | 43.4               | 108.5           | 1.1                | 43.1               | 107.7           | 1.8                | 41.9               | 104.7           | 2.8                |
| Succinate                         | 5                        | 3.4                | <u>68.1</u>     | 0.7                | 3.5                | <u>70.0</u>     | 2.8                | 3.6                | <u>72.1</u>     | 3.2                |
|                                   | 12                       | 8.9                | <u>73.9</u>     | 4.3                | 9.0                | <u>75.3</u>     | 1.9                | 9.5                | <u>79.3</u>     | 1.1                |
|                                   | 40                       | 27.0               | <u>67.4</u>     | 2.5                | 27.7               | <u>69.4</u>     | 1.7                | 30.8               | <u>77.0</u>     | 4.4                |

Deviations >10% are underlined once; deviations >15%, which do not meet FDA recommendations, are underlined twice;  $n = 5$  for each QC and time point.

Table S8. Stability of quality controls in surrogate matrix at 4 °C (refrigerator).

| QCs in Surrogate Matrix<br>at 4 °C for | Exp. Conc.<br>(μM) | Mean<br>(μM) | Accuracy<br>(%) | Precision<br>(%CV) |
|----------------------------------------|--------------------|--------------|-----------------|--------------------|--------------|-----------------|--------------------|--------------|-----------------|--------------------|--------------|-----------------|--------------------|
|                                        |                    | 1 day        |                 |                    | 1 week       |                 |                    | 2 weeks      |                 |                    | 3 weeks      |                 |                    |
| Itaconate                              | 0.3                | 0.3          | 103.1           | 2.0                | 0.3          | 101.2           | 1.8                | 0.3          | 99.6            | 2.9                | 0.3          | 102.7           | 5.2                |
|                                        | 3                  | 3.2          | 105.7           | 2.8                | 3.2          | 105.2           | 0.8                | 3.2          | 105.1           | 2.0                | 3.2          | 105.8           | 1.5                |
|                                        | 80                 | 77.0         | 96.3            | 1.7                | 80.8         | 101.0           | 1.8                | 79.9         | 99.9            | 1.3                | 79.2         | 99.0            | 4.4                |
| Citraconate                            | 0.15               | 0.2          | 109.2           | 4.3                | 0.2          | 107.1           | 3.9                | 0.2          | 106.3           | 3.1                | 0.2          | 108.7           | 4.5                |
|                                        | 3                  | 3.1          | 104.7           | 2.7                | 3.2          | 105.1           | 2.3                | 3.2          | 105.7           | 2.2                | 3.2          | 105.7           | 0.7                |
|                                        | 40                 | 40.1         | 100.3           | 1.0                | 41.0         | 102.6           | 1.1                | 41.0         | 102.5           | 0.9                | 40.7         | 101.9           | 2.2                |
| Mesaconate                             | 0.3                | 0.3          | 102.2           | 3.0                | 0.3          | 104.5           | 2.5                | 0.3          | 104.3           | 3.7                | 0.3          | 104.1           | 4.1                |
|                                        | 3                  | 3.3          | 109.1           | 2.5                | 3.3          | 109.5           | 1.8                | 3.3          | <u>110.1</u>    | 1.8                | 3.3          | 109.9           | 2.1                |
|                                        | 80                 | 79.9         | 99.9            | 1.7                | 80.8         | 101.0           | 1.0                | 80.6         | 100.8           | 1.5                | 80.9         | 101.1           | 1.7                |
| 4-Octyl-itaconate                      | 0.03               | 0.03         | 100.5           | 12.2               | 0.03         | 108.3           | 5.6                | 0.03         | <u>110.3</u>    | 2.5                | 0.03         | <u>113.1</u>    | 3.0                |
|                                        | 0.3                | 0.3          | 102.3           | 4.7                | 0.3          | 102.5           | 4.1                | 0.3          | 105.2           | 2.9                | 0.3          | 102.7           | 3.0                |
|                                        | 2                  | 1.9          | 93.5            | 1.9                | 1.8          | <u>89.1</u>     | 7.7                | 1.9          | 96.7            | 2.2                | 1.9          | 95.0            | 4.3                |
| cis-Aconitate                          | 0.15               | 0.1          | 95.3            | 6.8                | 0.2          | 109.6           | 2.3                | 0.2          | 105.7           | 1.1                | 0.2          | 107.7           | 2.6                |
|                                        | 3                  | 2.9          | 97.0            | 1.9                | 3.0          | 98.5            | 2.9                | 2.9          | 97.1            | 1.0                | 2.9          | 97.2            | 1.4                |
|                                        | 40                 | 38.4         | 96.1            | 1.3                | 39.9         | 99.7            | 1.1                | 39.3         | 98.2            | 1.5                | 39.6         | 98.9            | 3.4                |
| Citrate                                | 1.2                | 1.3          | 105.7           | 0.9                | 1.3          | 107.2           | 2.0                | 1.3          | 108.2           | 4.0                | 1.4          | <u>113.3</u>    | 8.9                |
|                                        | 6                  | 6.4          | 106.0           | 1.6                | 6.3          | 104.9           | 1.7                | 6.4          | 106.9           | 0.9                | 6.4          | 106.9           | 0.6                |
|                                        | 20                 | 20.5         | 102.5           | 1.5                | 20.4         | 102.1           | 1.1                | 20.0         | 99.9            | 2.1                | 20.3         | 101.6           | 3.0                |
| Fumarate                               | 5                  | 5.1          | 102.4           | 1.6                | 5.4          | 107.5           | 1.9                | 5.3          | 106.5           | 3.1                | 5.4          | 107.4           | 3.2                |
|                                        | 12                 | 12.4         | 103.3           | 2.4                | 13.2         | 109.7           | 1.7                | 13.2         | <u>110.2</u>    | 1.1                | 13.1         | 109.2           | 3.3                |
|                                        | 40                 | 38.4         | 96.1            | 2.1                | 41.4         | 103.6           | 3.8                | 40.1         | 100.4           | 5.8                | 40.4         | 101.1           | 8.9                |
| Isocitrate                             | 0.6                | 0.7          | <u>113.8</u>    | 2.6                | 0.6          | 104.9           | 1.8                | 0.6          | 103.5           | 3.5                | 0.6          | 106.2           | 5.6                |
|                                        | 6                  | 7.4          | <u>123.9</u>    | 2.4                | 6.7          | <u>111.4</u>    | 1.0                | 6.7          | <u>111.9</u>    | 1.9                | 6.8          | <u>112.8</u>    | 5.2                |
|                                        | 40                 | 42.8         | 106.9           | 0.6                | 41.5         | 103.8           | 2.1                | 41.3         | 103.2           | 4.4                | 41.0         | 102.5           | 2.6                |
| Lactate                                | 50                 | 49.3         | 98.5            | 3.7                | 48.7         | 97.4            | 3.4                | 54.9         | 109.8           | 6.6                | 58.3         | <u>116.6</u>    | 9.4                |
|                                        | 150                | 159.0        | 106.0           | 1.4                | 162.4        | 108.3           | 1.9                | 167.8        | <u>111.9</u>    | 1.7                | 167.0        | <u>111.3</u>    | 1.6                |
|                                        | 400                | 409.4        | 102.4           | 1.6                | 427.4        | 106.9           | 1.3                | 426.8        | 106.7           | 1.3                | 423.6        | 105.9           | 2.0                |
| Malate                                 | 0.6                | 0.7          | <u>115.1</u>    | 2.5                | 0.7          | <u>111.5</u>    | 5.2                | 0.7          | <u>111.8</u>    | 6.2                | 0.7          | <u>115.0</u>    | 8.1                |
|                                        | 6                  | 7.2          | <u>119.9</u>    | 2.7                | 6.7          | <u>112.2</u>    | 1.4                | 6.8          | <u>112.8</u>    | 1.4                | 6.8          | <u>113.3</u>    | 5.3                |
|                                        | 40                 | 42.5         | 106.4           | 0.8                | 42.0         | 104.9           | 2.1                | 41.7         | 104.3           | 3.4                | 41.6         | 104.0           | 2.4                |
| Succinate                              | 5                  | 3.5          | <u>69.2</u>     | 2.1                | 3.6          | <u>72.8</u>     | 1.8                | 3.8          | <u>76.8</u>     | 1.6                | 3.9          | <u>77.2</u>     | 2.0                |
|                                        | 12                 | 8.8          | <u>73.2</u>     | 1.9                | 9.4          | <u>78.0</u>     | 2.3                | 9.7          | <u>80.5</u>     | 0.6                | 9.4          | <u>78.6</u>     | 4.0                |
|                                        | 40                 | 28.7         | <u>71.8</u>     | 2.7                | 30.4         | <u>76.0</u>     | 3.5                | 30.4         | <u>76.0</u>     | 5.5                | 29.9         | <u>74.7</u>     | 7.8                |

Deviations >10% are underlined once; deviations >15%, which do not meet FDA recommendations, are underlined twice; *n* = 5 for each QC and time point.

**Table S9.** Stability of quality controls in surrogate matrix processed with extraction solvent at -20 °C and -80 °C.

| QCs in Extraction Solvent<br>at -20 °C for | Exp. Conc.<br>(μM) | Mean<br>(μM) | Accuracy<br>(%) | Precision<br>(%CV) | Mean<br>(μM)      | Accuracy<br>(%) | Precision<br>(%CV) |
|--------------------------------------------|--------------------|--------------|-----------------|--------------------|--------------|-----------------|--------------------|--------------|-----------------|--------------------|--------------|-----------------|--------------------|-------------------|-----------------|--------------------|
|                                            |                    | 1 day        |                 |                    | 2 days       |                 |                    | 7 days       |                 |                    | 35 days      |                 |                    | 21 days at -80 °C |                 |                    |
| Itaconate                                  | 0.3                | 0.3          | 103.9           | 2.4                | 0.3          | 97.6            | 4.9                | 0.3          | 102.7           | 2.5                | 0.3          | 107.3           | 2.3                | 0.3               | 109.8           | 1.6                |
|                                            | 3                  | 3.1          | 102.1           | 1.5                | 3.0          | 101.4           | 2.1                | 3.2          | 105.2           | 1.7                | 3.2          | 105.1           | 0.5                | 3.3               | 108.9           | 1.8                |
|                                            | 80                 | 87.7         | 109.6           | 3.5                | 84.2         | 105.3           | 2.6                | 84.6         | 105.7           | 2.1                | 85.3         | 106.7           | 1.4                | 87.9              | 109.9           | 2.3                |
| Citraconate                                | 0.15               | 0.2          | 103.1           | 2.3                | 0.1          | 96.1            | 5.6                | 0.2          | 102.9           | 5.1                | 0.2          | 101.2           | 5.8                | 0.1               | 96.1            | 5.5                |
|                                            | 3                  | 3.0          | 100.6           | 3.2                | 3.1          | 101.7           | 2.9                | 3.1          | 103.6           | 1.3                | 3.0          | 101.5           | 2.3                | 3.2               | 106.5           | 1.5                |
|                                            | 40                 | 43.5         | 108.8           | 3.8                | 42.2         | 105.5           | 1.8                | 42.3         | 105.8           | 1.7                | 43.1         | 107.8           | 1.6                | 43.1              | 107.8           | 3.0                |
| Mesaconate                                 | 0.3                | 0.3          | 97.7            | 7.8                | 0.3          | 106.1           | 4.3                | 0.3          | 105.7           | 2.8                | 0.3          | 105.8           | 4.9                | 0.3               | <u>110.5</u>    | 4.5                |
|                                            | 3                  | 3.1          | 102.7           | 2.2                | 3.1          | 104.5           | 2.2                | 3.2          | 106.3           | 0.6                | 3.1          | 103.7           | 2.3                | 3.2               | 105.8           | 0.9                |
|                                            | 80                 | 87.3         | 109.2           | 3.9                | 85.2         | 106.5           | 1.8                | 84.3         | 105.4           | 2.1                | 86.0         | 107.5           | 1.3                | 86.7              | 108.4           | 2.0                |
| 4-Octyl-itaconate                          | 0.03               | 0.03         | 106.2           | 5.6                | 0.03         | <u>88.9</u>     | 5.8                | 0.03         | <u>114.9</u>    | 1.8                | 0.03         | 97.0            | 8.8                | 0.03              | 103.8           | 10.9               |
|                                            | 0.3                | 0.3          | <u>88.0</u>     | 2.9                | 0.3          | <u>85.3</u>     | 4.1                | 0.3          | 103.4           | 1.3                | 0.2          | <u>77.0</u>     | 0.8                | 0.2               | <u>82.8</u>     | 9.5                |
|                                            | 2                  | 2.0          | 99.3            | 3.6                | 1.8          | 92.0            | 2.5                | 2.2          | <u>111.8</u>    | 1.6                | 1.7          | <u>85.0</u>     | 0.4                | 2.0               | 101.5           | 9.8                |
| cis-Aconitate                              | 0.15               | 0.2          | 102.5           | 3.8                | 0.2          | 101.9           | 4.0                | 0.1          | 98.3            | 6.0                | 0.2          | 100.1           | 2.7                | 0.1               | 98.4            | 3.6                |
|                                            | 3                  | 3.0          | 100.4           | 2.1                | 3.1          | 102.2           | 1.4                | 3.1          | 104.3           | 1.4                | 3.1          | 103.2           | 2.5                | 3.2               | 105.3           | 2.2                |
|                                            | 40                 | 43.3         | 108.4           | 1.4                | 43.1         | 107.8           | 2.0                | 44.1         | <u>110.2</u>    | 1.7                | 43.9         | 109.8           | 2.0                | 44.3              | <u>110.8</u>    | 2.2                |
| Citrate                                    | 1.2                | 1.3          | 105.7           | 1.8                | 1.3          | 104.7           | 1.8                | 1.3          | <u>112.0</u>    | 2.5                | 1.4          | <u>113.7</u>    | 1.7                | 1.3               | 107.7           | 2.1                |
|                                            | 6                  | 6.3          | 105.7           | 2.4                | 6.6          | 109.6           | 1.5                | 6.6          | <u>110.2</u>    | 2.4                | 6.9          | <u>114.7</u>    | 1.1                | 6.6               | <u>110.1</u>    | 1.1                |
|                                            | 20                 | 21.5         | 107.3           | 1.7                | 22.0         | <u>110.2</u>    | 2.0                | 21.9         | 109.4           | 1.1                | 23.5         | <u>117.5</u>    | 2.4                | 22.0              | <u>110.2</u>    | 2.1                |
| Fumarate                                   | 5                  | 5.4          | 108.8           | 1.9                | 5.4          | 108.8           | 2.9                | 5.7          | <u>114.6</u>    | 1.9                | 5.9          | <u>117.2</u>    | 1.0                | 5.6               | <u>112.3</u>    | 4.3                |
|                                            | 12                 | 12.7         | 106.2           | 1.8                | 13.0         | 108.3           | 2.9                | 13.7         | <u>113.8</u>    | 2.3                | 14.1         | <u>117.2</u>    | 3.2                | 14.0              | <u>116.5</u>    | 2.5                |
|                                            | 40                 | 44.0         | 110.0           | 2.7                | 44.8         | <u>112.0</u>    | 3.0                | 46.5         | <u>116.2</u>    | 2.6                | 47.7         | <u>119.4</u>    | 3.3                | 45.3              | <u>113.3</u>    | 2.0                |
| Isocitrate                                 | 0.6                | 0.6          | 98.3            | 5.0                | 0.6          | 101.1           | 3.2                | 0.6          | 95.9            | 2.7                | 0.6          | 106.6           | 4.7                | 0.7               | 108.6           | 5.4                |
|                                            | 6                  | 6.3          | 104.2           | 2.7                | 6.5          | 108.4           | 3.2                | 6.2          | 104.0           | 2.2                | 6.4          | 107.4           | 2.4                | 6.9               | <u>115.3</u>    | 3.9                |
|                                            | 40                 | 41.4         | 103.5           | 3.2                | 40.1         | 100.3           | 2.0                | 40.8         | 102.0           | 4.4                | 43.3         | 108.3           | 2.8                | 43.8              | 109.4           | 0.9                |
| Lactate                                    | 50                 | 52.2         | 104.3           | 2.1                | 56.4         | <u>112.8</u>    | 11.0               | 58.3         | <u>116.6</u>    | 11.4               | 52.1         | 104.3           | 6.6                | 54.2              | 108.4           | 6.2                |
|                                            | 150                | 158.0        | 105.3           | 4.0                | 161.8        | 107.9           | 2.7                | 165.8        | <u>110.5</u>    | 1.3                | 163.0        | 108.7           | 4.1                | 171.6             | <u>114.4</u>    | 5.1                |
|                                            | 400                | 432.8        | 108.2           | 2.9                | 427.2        | 106.8           | 2.2                | 445.4        | <u>111.4</u>    | 1.5                | 442.4        | <u>110.6</u>    | 3.9                | 441.4             | <u>110.4</u>    | 1.5                |
| Malate                                     | 0.6                | 0.6          | 107.1           | 3.9                | 0.7          | <u>111.9</u>    | 3.1                | 0.7          | <u>110.7</u>    | 4.5                | 0.7          | 108.4           | 3.1                | 0.7               | <u>118.5</u>    | 6.0                |
|                                            | 6                  | 6.4          | 107.2           | 2.9                | 6.7          | <u>111.5</u>    | 1.6                | 6.5          | 107.5           | 2.5                | 6.6          | <u>110.1</u>    | 2.0                | 7.2               | <u>120.1</u>    | 3.4                |
|                                            | 40                 | 42.0         | 105.1           | 2.9                | 40.5         | 101.2           | 1.9                | 41.0         | 102.4           | 3.6                | 44.3         | <u>110.7</u>    | 2.8                | 45.2              | <u>113.0</u>    | 1.4                |
| Succinate                                  | 5                  | 4.4          | <u>88.0</u>     | 2.2                | 4.5          | <u>89.2</u>     | 3.3                | 4.6          | 92.3            | 2.7                | 4.6          | 91.4            | 3.4                | 4.5               | <u>89.8</u>     | 5.9                |
|                                            | 12                 | 10.6         | <u>88.3</u>     | 2.4                | 11.1         | 92.5            | 0.9                | 11.1         | 92.8            | 2.9                | 11.1         | 92.7            | 2.7                | 11.2              | 93.3            | 3.0                |
|                                            | 40                 | 38.3         | 95.9            | 3.2                | 39.9         | 99.7            | 3.0                | 40.3         | 100.9           | 2.5                | 42.4         | 106.1           | 2.5                | 40.0              | 100.0           | 2.1                |

Deviations >10% are underlined once; deviations >15%, which do not meet FDA recommendations, are underlined twice; *n* = 5 for each QC and time point.

Table S10. Stability of quality controls as dried extracts at RT.

|                                       | Exp. Conc.<br>( $\mu$ M) | Mean<br>( $\mu$ M) | Accuracy<br>(%) | Precision<br>(%CV) |
|---------------------------------------|--------------------------|--------------------|-----------------|--------------------|--------------------|-----------------|--------------------|--------------------|-----------------|--------------------|--------------------|-----------------|--------------------|
| Dried Extracts<br>Stability at RT for |                          | 1 day              |                 |                    | 1 week             |                 |                    | 2 weeks            |                 |                    | 3 weeks            |                 |                    |
| Itaconate                             | 0.3                      | 0.3                | 101.8           | 2.6                | 0.3                | 101.7           | 1.8                | 0.3                | 102.2           | 6.3                | 0.3                | 102.2           | 2.7                |
|                                       | 3                        | 3.2                | 105.3           | 1.5                | 3.1                | 103.9           | 1.8                | 3.2                | 105.3           | 1.3                | 3.2                | 107.4           | 1.2                |
|                                       | 80                       | 78.6               | 98.2            | 1.3                | 73.4               | 91.8            | 3.6                | 77.4               | 96.7            | 1.4                | 83.3               | 104.1           | 3.1                |
| Citraconate                           | 0.15                     | 0.2                | <u>113.7</u>    | 4.9                | 0.2                | 105.2           | 4.4                | 0.2                | 109.5           | 1.0                | 0.2                | <u>111.3</u>    | 4.3                |
|                                       | 3                        | 3.1                | 104.8           | 1.6                | 3.1                | 103.7           | 1.4                | 3.2                | 105.7           | 1.4                | 3.3                | 109.3           | 2.8                |
|                                       | 40                       | 40.7               | 101.9           | 1.3                | 38.8               | 97.0            | 3.2                | 40.6               | 101.6           | 1.1                | 42.5               | 106.4           | 1.8                |
| Mesaconate                            | 0.3                      | 0.3                | 100.3           | 5.9                | 0.3                | 107.8           | 2.6                | 0.3                | 108.1           | 7.4                | 0.3                | 105.9           | 7.1                |
|                                       | 3                        | 3.3                | 109.0           | 1.6                | 3.2                | 107.5           | 1.3                | 3.3                | 109.0           | 1.6                | 3.5                | <u>117.1</u>    | 2.9                |
|                                       | 80                       | 81.2               | 101.5           | 1.6                | 77.9               | 97.3            | 2.7                | 80.3               | 100.4           | 1.0                | 83.1               | 103.8           | 2.0                |
| 4-Octyl-itaconate                     | 0.03                     | 0.03               | 98.7            | 11.8               | 0.03               | 93.3            | <u>15.3</u>        | 0.03               | 93.9            | 11.2               | 0.03               | 95.7            | 4.5                |
|                                       | 0.3                      | 0.3                | 103.5           | 2.2                | 0.3                | 91.7            | 7.5                | 0.3                | 93.3            | 3.2                | 0.3                | 96.6            | 3.5                |
|                                       | 2                        | 1.9                | 95.7            | 2.7                | 1.7                | <u>82.8</u>     | 6.2                | 1.8                | <u>88.0</u>     | 1.6                | 1.8                | <u>89.0</u>     | 3.4                |
| cis-Aconitate                         | 0.15                     | 0.1                | 94.1            | 7.1                | 0.2                | 107.6           | 1.8                | 0.2                | 108.7           | 4.1                | 0.2                | 106.4           | 3.7                |
|                                       | 3                        | 2.9                | 97.1            | 1.6                | 2.9                | 96.3            | 0.5                | 2.9                | 97.7            | 1.6                | 3.0                | 100.5           | 1.2                |
|                                       | 40                       | 39.6               | 99.0            | 0.8                | 40.1               | 100.2           | 4.9                | 39.0               | 97.6            | 1.8                | 41.0               | 102.6           | 2.2                |
| Citrate                               | 1.2                      | 1.3                | 105.2           | 4.5                | 1.3                | 107.8           | 2.3                | 1.3                | <u>110.5</u>    | 6.7                | 1.4                | <u>118.2</u>    | 2.5                |
|                                       | 6                        | 6.3                | 104.8           | 1.7                | 6.5                | 107.8           | 0.8                | 6.4                | 106.6           | 1.4                | 6.8                | <u>113.5</u>    | 7.2                |
|                                       | 20                       | 20.4               | 101.8           | 1.8                | 20.0               | 100.0           | 1.5                | 20.3               | 101.7           | 1.8                | 22.1               | <u>110.3</u>    | 7.8                |
| Fumarate                              | 5                        | 5.1                | 101.0           | 3.0                | 5.0                | 100.2           | 2.7                | 5.2                | 103.4           | 3.2                | 5.3                | 105.8           | 1.9                |
|                                       | 12                       | 12.3               | 102.7           | 1.9                | 12.3               | 102.7           | 2.5                | 12.5               | 103.8           | 3.3                | 13.1               | 108.8           | 1.3                |
|                                       | 40                       | 40.7               | 101.7           | 3.7                | 36.9               | 92.2            | 4.4                | 37.0               | 92.5            | 4.1                | 41.8               | 104.4           | 7.8                |
| Isocitrate                            | 0.6                      | 0.7                | <u>112.6</u>    | 3.0                | 0.7                | <u>115.7</u>    | 3.6                | 0.7                | <u>114.3</u>    | 4.1                | 0.6                | 106.9           | 2.1                |
|                                       | 6                        | 7.2                | <u>120.7</u>    | 2.4                | 7.3                | <u>121.9</u>    | 4.2                | 7.4                | <u>123.3</u>    | 2.6                | 6.8                | <u>114.1</u>    | 2.1                |
|                                       | 40                       | 39.8               | 99.6            | 3.4                | 41.1               | 102.7           | 5.3                | 42.9               | 107.3           | 1.4                | 42.4               | 106.1           | 3.9                |
| Lactate                               | 50                       | 55.3               | <u>110.5</u>    | 3.6                | 52.8               | 105.6           | 4.3                | 56.0               | <u>112.0</u>    | 7.7                | 67.1               | <u>134.2</u>    | <u>20.4</u>        |
|                                       | 150                      | 162.4              | 108.3           | 2.8                | 165.8              | <u>110.5</u>    | 2.5                | 168.2              | <u>112.1</u>    | 4.0                | 186.6              | <u>124.4</u>    | 11.8               |
|                                       | 400                      | 403.6              | 100.9           | 2.0                | 411.0              | 102.8           | 1.9                | 425.2              | 106.3           | 1.2                | 467.4              | <u>116.9</u>    | 10.6               |
| Malate                                | 0.6                      | 0.7                | <u>119.6</u>    | 10.5               | 0.8                | <u>133.4</u>    | 6.8                | 0.7                | <u>122.8</u>    | 4.9                | 0.7                | <u>114.7</u>    | 3.0                |
|                                       | 6                        | 7.1                | <u>117.5</u>    | 2.4                | 7.4                | <u>123.9</u>    | 6.7                | 7.5                | <u>125.2</u>    | 4.1                | 7.0                | <u>116.9</u>    | 2.8                |
|                                       | 40                       | 40.1               | 100.2           | 3.3                | 41.9               | 104.8           | 4.3                | 43.8               | 109.5           | 1.2                | 42.3               | 105.7           | 5.4                |
| Succinate                             | 5                        | 3.5                | <u>69.6</u>     | 3.4                | 3.7                | <u>73.5</u>     | 1.7                | 3.8                | <u>75.3</u>     | 4.0                | 3.8                | <u>76.9</u>     | 2.6                |
|                                       | 12                       | 8.8                | <u>73.5</u>     | 2.5                | 9.1                | <u>76.2</u>     | 2.4                | 9.2                | <u>76.8</u>     | 1.3                | 9.7                | <u>80.8</u>     | 1.7                |
|                                       | 40                       | 30.3               | <u>75.7</u>     | 4.3                | 28.2               | <u>70.4</u>     | 2.1                | 27.6               | <u>69.0</u>     | 3.4                | 30.6               | <u>76.5</u>     | 6.4                |

Deviations >10% are underlined once; deviations >15%, which do not meet FDA recommendations, are underlined twice;  $n = 5$  for each QC and time point.

Table S11. Stability of quality controls in surrogate matrix after repeated freezing and thawing.

|                       | Exp. Conc.<br>( $\mu$ M) | Mean<br>( $\mu$ M) | Accuracy<br>(%) | Precision<br>(%CV) |
|-----------------------|--------------------------|--------------------|-----------------|--------------------|--------------------|-----------------|--------------------|--------------------|-----------------|--------------------|--------------------|-----------------|--------------------|
| Freeze/Thaw<br>Cycles |                          | 1 cycle            |                 |                    | 2 cycles           |                 |                    | 3 cycles           |                 |                    | 4 cycles           |                 |                    |
| Itaconate             | 0.3                      | 0.3                | 106.8           | 2.4                | 0.3                | 101.4           | 4.2                | 0.3                | 100.7           | 2.0                | 0.3                | 98.6            | 4.4                |
|                       | 3                        | 3.1                | 101.7           | 0.9                | 3.0                | 100.6           | 1.2                | 3.0                | 98.4            | 0.9                | 3.1                | 103.2           | 1.4                |
|                       | 80                       | 85.2               | 106.5           | 0.7                | 83.0               | 103.7           | 1.3                | 83.0               | 103.8           | 1.6                | 82.4               | 103.0           | 1.1                |
| Citraconate           | 0.15                     | 0.1                | 99.2            | 1.9                | 0.2                | 100.9           | 1.9                | 0.2                | 102.8           | 5.3                | 0.1                | 96.8            | 2.8                |
|                       | 3                        | 3.0                | 99.7            | 1.8                | 3.0                | 100.5           | 1.3                | 2.9                | 98.2            | 1.7                | 3.1                | 101.7           | 2.4                |
|                       | 40                       | 42.3               | 105.7           | 1.2                | 41.1               | 102.9           | 1.2                | 41.2               | 103.1           | 2.5                | 41.5               | 103.8           | 1.0                |
| Mesaconate            | 0.3                      | 0.3                | 99.5            | 4.5                | 0.3                | 97.7            | 5.4                | 0.3                | 99.1            | 9.5                | 0.3                | 101.9           | 5.8                |
|                       | 3                        | 3.0                | 101.1           | 1.0                | 3.1                | 102.0           | 1.2                | 3.0                | 101.5           | 1.8                | 3.2                | 105.1           | 2.2                |
|                       | 80                       | 84.4               | 105.6           | 1.7                | 83.4               | 104.3           | 1.6                | 82.9               | 103.6           | 1.4                | 83.1               | 103.9           | 1.2                |
| 4-Octyl-itaconate     | 0.03                     | 0.03               | 104.6           | 4.3                | 0.03               | <u>110.9</u>    | 10.9               | 0.03               | <u>113.4</u>    | 7.5                | 0.03               | <u>112.7</u>    | 4.4                |
|                       | 0.3                      | 0.3                | <u>88.0</u>     | 3.0                | 0.3                | <u>89.1</u>     | 2.8                | 0.3                | 90.3            | 2.0                | 0.3                | 99.8            | 1.0                |
|                       | 2                        | 2.1                | 104.4           | 2.5                | 2.3                | <u>113.5</u>    | 2.0                | 2.2                | <u>110.6</u>    | 2.2                | 2.2                | 107.7           | 0.9                |
| cis-Aconitate         | 0.15                     | 0.1                | 95.6            | 14.0               | 0.1                | 96.9            | 5.3                | 0.1                | 97.3            | 3.6                | 0.1                | 94.5            | 3.4                |
|                       | 3                        | 3.0                | 100.5           | 1.2                | 3.0                | 98.5            | 0.9                | 2.9                | 97.7            | 1.2                | 3.0                | 100.3           | 1.0                |
|                       | 40                       | 42.9               | 107.3           | 0.6                | 41.8               | 104.6           | 1.7                | 41.8               | 104.6           | 0.5                | 42.3               | 105.8           | 1.4                |
| Citrate               | 1.2                      | 1.2                | 103.3           | 1.6                | 1.2                | 100.5           | 2.3                | 1.2                | 98.5            | 1.5                | 1.2                | 101.7           | 4.5                |
|                       | 6                        | 6.3                | 105.7           | 0.9                | 6.1                | 101.5           | 0.8                | 6.1                | 101.1           | 1.8                | 6.2                | 102.7           | 1.4                |
|                       | 20                       | 20.7               | 103.5           | 1.5                | 20.9               | 104.5           | 1.6                | 20.5               | 102.5           | 2.2                | 20.4               | 101.9           | 1.6                |
| Fumarate              | 5                        | 5.3                | 105.5           | 1.6                | 5.2                | 103.6           | 2.0                | 5.1                | 102.7           | 1.7                | 5.2                | 104.7           | 2.1                |
|                       | 12                       | 12.9               | 107.5           | 1.2                | 12.4               | 103.0           | 0.7                | 12.4               | 103.0           | 2.2                | 12.9               | 107.3           | 1.9                |
|                       | 40                       | 43.1               | 107.9           | 2.2                | 44.2               | <u>110.4</u>    | 2.4                | 42.5               | 106.4           | 2.1                | 42.7               | 106.9           | 2.2                |
| Isocitrate            | 0.6                      | 0.6                | 99.7            | 0.8                | 0.6                | 99.6            | 3.0                | 0.6                | 96.5            | 4.8                | 0.6                | 96.4            | 5.8                |
|                       | 6                        | 6.3                | 105.0           | 1.4                | 6.2                | 103.5           | 2.9                | 6.4                | 106.1           | 1.0                | 6.2                | 103.0           | 2.2                |
|                       | 40                       | 41.1               | 102.7           | 2.7                | 40.0               | 100.0           | 2.1                | 39.1               | 97.7            | 2.8                | 41.2               | 103.0           | 3.0                |
| Lactate               | 50                       | 52.6               | 105.2           | 3.8                | 54.7               | 109.4           | 3.8                | 50.4               | 100.8           | 6.6                | 50.1               | 100.2           | 5.4                |
|                       | 150                      | 158.2              | 105.5           | 2.3                | 159.0              | 106.0           | 6.0                | 158.4              | 105.6           | 0.8                | 157.0              | 104.7           | 1.7                |
|                       | 400                      | 428.0              | 107.0           | 3.4                | 407.8              | 102.0           | 2.1                | 415.6              | 103.9           | 1.0                | 423.6              | 105.9           | 1.8                |
| Malate                | 0.6                      | 0.7                | <u>110.8</u>    | 2.9                | 0.7                | <u>115.0</u>    | 5.9                | 0.6                | 106.2           | 2.5                | 0.6                | 106.4           | 6.0                |
|                       | 6                        | 6.6                | 109.5           | 1.5                | 6.6                | 109.2           | 1.7                | 6.6                | <u>110.7</u>    | 0.4                | 6.3                | 105.2           | 1.4                |
|                       | 40                       | 41.6               | 103.9           | 2.8                | 40.2               | 100.5           | 2.0                | 39.3               | 98.2            | 2.3                | 41.1               | 102.8           | 1.8                |
| Succinate             | 5                        | 4.3                | <u>85.8</u>     | 1.8                | 4.3                | <u>86.1</u>     | 5.1                | 4.1                | <u>82.8</u>     | 2.0                | 4.2                | <u>83.0</u>     | 2.2                |
|                       | 12                       | 10.7               | <u>89.0</u>     | 1.0                | 10.6               | <u>88.2</u>     | 0.8                | 10.6               | <u>88.2</u>     | 3.4                | 10.4               | <u>87.0</u>     | 2.7                |
|                       | 40                       | 38.1               | 95.4            | 2.4                | 39.1               | 97.8            | 2.0                | 37.8               | 94.5            | 2.5                | 37.3               | 93.3            | 2.5                |

Deviations >10% are underlined once; deviations >15%, which do not meet FDA recommendations, are underlined twice;  $n = 5$  for each QC and time point.

Table S12. Long-term stability of quality controls in surrogate matrix at -20 °C.

| QCs in Surrogate Matrix<br>at -20 °C for | Exp. conc.<br>(μM) | Mean<br>(μM) | Accuracy<br>(%) | Precision<br>(%CV) | Mean<br>(μM) | Accuracy<br>(%) | Precision<br>(%CV) | Mean<br>(μM) | Accuracy<br>(%) | Precision<br>(%CV) | Mean<br>(μM)                                 | Accuracy<br>(%) | Precision<br>(%CV) | Mean<br>(μM)                               | Accuracy<br>(%) | Precision<br>(%CV) |
|------------------------------------------|--------------------|--------------|-----------------|--------------------|--------------|-----------------|--------------------|--------------|-----------------|--------------------|----------------------------------------------|-----------------|--------------------|--------------------------------------------|-----------------|--------------------|
|                                          |                    | 1 week       |                 |                    | 1 month      |                 |                    | 2 months     |                 |                    | 6 months<br>(ISTD <sup>13</sup> C Succinate) |                 |                    | 6 months<br>(ISTD <sup>13</sup> C Citrate) |                 |                    |
| Itaconate                                | 0.3                | 0.3          | 104.1           | 2.3                | 0.3          | <u>113.1</u>    | 4.0                | 0.3          | 104.4           | 1.6                | 0.3                                          | 100.7           | 1.2                |                                            |                 |                    |
|                                          | 3                  | 3.2          | 106.1           | 3.1                | 3.3          | 108.2           | 3.4                | 3.1          | 104.4           | 1.0                | 3.1                                          | 104.4           | 3.2                |                                            |                 |                    |
|                                          | 80                 | 84.3         | 105.4           | 2.8                | 86.5         | 108.2           | 3.0                | 88.3         | <u>110.3</u>    | 1.9                | 80.2                                         | 100.3           | 2.0                |                                            |                 |                    |
| Citraconate                              | 0.15               | 0.2          | 104.4           | 4.5                | 0.2          | 101.9           | 7.5                | 0.2          | 106.7           | 4.7                | 0.2                                          | 97.9            | 2.5                |                                            |                 |                    |
|                                          | 3                  | 3.1          | 104.5           | 2.3                | 3.2          | 105.5           | 3.3                | 3.1          | 103.7           | 1.0                | 3.2                                          | 107.2           | 2.1                |                                            |                 |                    |
|                                          | 40                 | 42.4         | 106.0           | 3.3                | 43.6         | 109.0           | 3.0                | 44.2         | <u>110.6</u>    | 2.2                | 39.7                                         | 99.4            | 2.1                |                                            |                 |                    |
| Mesaconate                               | 0.3                | 0.3          | 102.7           | 4.8                | 0.3          | 110.0           | 2.7                | 0.3          | <u>110.7</u>    | 2.7                | 0.3                                          | 95.9            | 1.9                |                                            |                 |                    |
|                                          | 3                  | 3.2          | 105.7           | 2.7                | 3.2          | 107.5           | 4.1                | 3.2          | 105.5           | 0.7                | 3.2                                          | 106.3           | 2.8                |                                            |                 |                    |
|                                          | 80                 | 85.3         | 106.7           | 3.1                | 89.1         | <u>111.4</u>    | 3.7                | 88.5         | <u>110.7</u>    | 2.6                | 80.2                                         | 100.3           | 1.6                |                                            |                 |                    |
| 4-Octyl-itaconate                        | 0.03               | 0.03         | <u>115.7</u>    | 4.7                | 0.04         | <u>116.9</u>    | 12.1               | 0.03         | <u>116.5</u>    | 2.2                | 0.03                                         | 100.6           | 7.6                |                                            |                 |                    |
|                                          | 0.3                | 0.3          | 102.9           | 3.4                | 0.3          | <u>84.8</u>     | 3.0                | 0.3          | 102.1           | 2.0                | 0.3                                          | 92.1            | 4.4                |                                            |                 |                    |
|                                          | 2                  | 2.3          | <u>112.5</u>    | 3.1                | 2.3          | <u>113.1</u>    | 3.6                | 2.2          | <u>112.2</u>    | 2.5                | 1.7                                          | <u>85.3</u>     | 3.7                |                                            |                 |                    |
| cis-Aconitate                            | 0.15               | 0.2          | 97.2            | 2.5                | 0.1          | 98.5            | 5.6                | 0.2          | 101.5           | 2.9                | 0.1                                          | 96.8            | 2.0                |                                            |                 |                    |
|                                          | 3                  | 3.1          | 103.2           | 2.2                | 3.2          | 105.0           | 2.1                | 3.1          | 103.3           | 3.1                | 3.0                                          | 99.3            | 3.1                |                                            |                 |                    |
|                                          | 40                 | 43.8         | 109.5           | 1.9                | 44.2         | <u>110.6</u>    | 3.0                | 45.2         | <u>113.1</u>    | 3.3                | 39.5                                         | 98.8            | 0.6                |                                            |                 |                    |
| Citrate                                  | 1.2                | 1.3          | 105.5           | 2.6                | 1.3          | 104.2           | 2.3                | 1.3          | 105.7           | 3.6                | 1.2                                          | 97.2            | 5.1                |                                            |                 |                    |
|                                          | 6                  | 6.4          | 106.7           | 1.9                | 6.5          | 107.8           | 2.1                | 6.4          | 106.9           | 3.1                | 6.2                                          | 103.3           | 4.1                |                                            |                 |                    |
|                                          | 20                 | 21.1         | 105.6           | 1.9                | 21.6         | 108.1           | 4.1                | 22.0         | <u>110.2</u>    | 3.2                | 19.0                                         | 94.9            | 2.7                |                                            |                 |                    |
| Fumarate                                 | 5                  | 5.6          | <u>111.7</u>    | 2.0                | 5.6          | <u>111.1</u>    | 1.3                | 5.5          | <u>110.7</u>    | 1.9                | 4.9                                          | 97.0            | 1.6                | 5.1                                        | 101.2           | 3.2                |
|                                          | 12                 | 13.4         | <u>111.8</u>    | 2.3                | 13.5         | <u>112.5</u>    | 2.7                | 13.5         | <u>112.2</u>    | 3.2                | 12.1                                         | 101.0           | 2.8                | 12.9                                       | 107.5           | 3.8                |
|                                          | 40                 | 45.5         | <u>113.9</u>    | 3.2                | 45.2         | <u>113.1</u>    | 5.3                | 45.9         | <u>114.8</u>    | 3.2                | 39.8                                         | 99.6            | 2.8                | 37.0                                       | 92.6            | 4.0                |
| Isocitrate                               | 0.6                | 0.6          | 100.3           | 2.4                | 0.6          | 106.7           | 5.5                | 0.6          | 106.2           | 4.9                | 0.7                                          | 109.4           | 3.4                |                                            |                 |                    |
|                                          | 6                  | 6.4          | 106.5           | 5.0                | 6.4          | 107.0           | 2.0                | 6.4          | 106.9           | 2.1                | 6.3                                          | 104.3           | 2.0                |                                            |                 |                    |
|                                          | 40                 | 43.4         | 108.6           | 4.0                | 42.1         | 105.3           | 4.0                | 44.2         | <u>110.4</u>    | 1.6                | 37.9                                         | 94.8            | 3.4                |                                            |                 |                    |
| Lactate                                  | 50                 | 55.4         | <u>110.7</u>    | 4.3                | 54.7         | 109.3           | 4.1                | 53.5         | 107.0           | 11.4               | 48.0                                         | 96.1            | 10.4               |                                            |                 |                    |
|                                          | 150                | 166.2        | <u>110.8</u>    | 3.8                | 165.6        | <u>110.4</u>    | 3.3                | 159.8        | 106.5           | 2.6                | 141.8                                        | 94.5            | 1.7                |                                            |                 |                    |
|                                          | 400                | 446.8        | <u>111.7</u>    | 2.2                | 439.8        | 110.0           | 3.3                | 447.8        | <u>112.0</u>    | 1.8                | 367.8                                        | 92.0            | 3.3                |                                            |                 |                    |
| Malate                                   | 0.6                | 0.7          | 108.3           | 4.1                | 0.7          | <u>112.5</u>    | 5.4                | 0.7          | <u>118.3</u>    | 8.9                | 0.6                                          | 103.0           | 7.4                |                                            |                 |                    |
|                                          | 6                  | 6.6          | 109.8           | 5.0                | 6.6          | 109.5           | 2.3                | 6.6          | <u>110.5</u>    | 2.7                | 6.4                                          | 106.9           | 2.7                |                                            |                 |                    |
|                                          | 40                 | 42.8         | 106.9           | 3.0                | 43.0         | 107.4           | 2.5                | 43.7         | 109.3           | 2.2                | 37.7                                         | 94.2            | 2.8                |                                            |                 |                    |
| Succinate                                | 5                  | 4.4          | <u>87.3</u>     | 2.6                | 4.2          | <u>84.5</u>     | 2.4                | 4.9          | 97.3            | 2.6                | 4.6                                          | 92.2            | 4.0                | 4.8                                        | 96.4            | 5.2                |
|                                          | 12                 | 10.9         | 91.0            | 3.7                | 10.7         | <u>89.0</u>     | 3.1                | 12.1         | 101.0           | 3.8                | 11.8                                         | 98.2            | 4.1                | 12.5                                       | 104.5           | 4.9                |
|                                          | 40                 | 39.2         | 98.0            | 2.7                | 39.7         | 99.4            | 6.2                | 42.7         | 106.7           | 2.4                | 38.2                                         | 95.4            | 3.2                | 33.3                                       | <u>83.2</u>     | 4.6                |

Deviations >10% are underlined once; deviations >15%, which do not meet FDA recommendations, are underlined twice; *n* = 5 for each QC and time point.

**Table S13.** Base level concentrations of itaconate isomers and TCA intermediates in plasma/whole blood from donor C.

|                   | Mean<br>( $\mu\text{M}$ ) | Precision<br>(%CV) | Mean<br>( $\mu\text{M}$ ) | Precision<br>(%CV) |
|-------------------|---------------------------|--------------------|---------------------------|--------------------|
|                   | Plasma                    |                    | Whole Blood               |                    |
| Itaconate         | <LLOQ                     |                    | <LLOQ                     |                    |
| Citraconate       | 0.39                      | 3.5                | 0.35                      | 7.8                |
| Mesaconate        | <LLOQ                     |                    | <LLOQ                     |                    |
| 4-Octyl-itaconate | <LLOQ                     |                    | <LLOQ                     |                    |
| cis-Aconitate     | 3.34                      | 3.9                | 1.78                      | 7.1                |
| Citrate           | 123.24                    | 0.9                | 63.45                     | 4.4                |
| Fumarate          | <LLOQ                     |                    | <LLOQ                     |                    |
| Isocitrate        | 40.06                     | 2.6                | 19.86                     | 6.9                |
| Lactate           | 1247.20                   | 2.0                | 898.50                    | 7.1                |
| Malate            | 10.58                     | 1.4                | 23.20                     | 7.1                |
| Succinate         | 4.58                      | 3.7                | 2.98                      | 3.8                |

$n = 5$  aliquots from each biosample type.

**Table S14.** Stability of spiked-in itaconate isomers and derivatives in plasma from donor C at RT and 4 °C.

|                        | Exp. Conc.<br>( $\mu$ M) | Mean<br>( $\mu$ M) | Accuracy<br>(%) | Precision<br>(%CV) |
|------------------------|--------------------------|--------------------|-----------------|--------------------|--------------------|-----------------|--------------------|--------------------|-----------------|--------------------|--------------------|-----------------|--------------------|
| Stability<br>in Plasma |                          | 0 h at RT          |                 |                    | 8 h at RT          |                 |                    | 24 h at RT         |                 |                    | 24 h at 4 °C       |                 |                    |
| Itaconate              | 0.3                      | 0.3                | 108.5           | 2.9                | 0.3                | 107.9           | 2.0                | 0.3                | 106.4           | 2.2                | 0.3                | 107.1           | 1.8                |
|                        | 3                        | 3.2                | 105.6           | 1.4                | 3.2                | 106.2           | 0.9                | 3.1                | 104.0           | 2.4                | 3.1                | 104.4           | 2.2                |
|                        | 80                       | 82.6               | 103.3           | 0.9                | 81.7               | 102.1           | 1.0                | 82.0               | 102.6           | 2.8                | 81.8               | 102.3           | 1.7                |
| Citraconate            | 0.15                     | 0.1                | <u>84.7</u>     | <u>16.2</u>        | 0.0                | <u>-30.4</u>    | -22.2              | 0.0                | <u>-22.4</u>    | -37.2              | 0.0                | <u>4.3</u>      | <u>94.4</u>        |
|                        | 3                        | 3.0                | 99.2            | 3.0                | 2.0                | <u>67.5</u>     | 3.3                | 2.1                | <u>69.9</u>     | 3.0                | 2.2                | <u>74.4</u>     | 2.4                |
|                        | 40                       | 40.4               | 101.1           | 1.3                | 39.6               | 99.0            | 1.2                | 40.2               | 100.6           | 2.2                | 39.9               | 99.8            | 2.0                |
| Mesaconate             | 0.3                      | 0.3                | 90.2            | 0.0                | 0.2                | <u>57.4</u>     | 7.5                | 0.2                | <u>57.0</u>     | 5.4                | 0.2                | <u>63.0</u>     | 2.0                |
|                        | 3                        | 2.7                | <u>89.7</u>     | 0.1                | 1.9                | <u>62.5</u>     | 2.8                | 1.9                | <u>63.1</u>     | 1.7                | 2.0                | <u>65.8</u>     | 1.6                |
|                        | 80                       | 84.6               | 105.8           | 0.8                | 81.8               | 102.2           | 1.6                | 82.2               | 102.8           | 1.8                | 81.7               | 102.1           | 1.0                |
| 4-Octyl-itaconate      | 0.03                     | 0.03               | 99.2            | 4.5                | 0.02               | <u>69.4</u>     | 3.7                | 0.02               | <u>63.7</u>     | 4.4                | 0.02               | <u>62.5</u>     | 12.5               |
|                        | 0.3                      | 0.3                | 94.6            | 6.5                | 0.2                | <u>71.1</u>     | 2.5                | 0.2                | <u>63.3</u>     | 4.2                | 0.2                | <u>63.5</u>     | 7.1                |
|                        | 2                        | 2.0                | 98.7            | 2.5                | 2.0                | 100.4           | 2.8                | 1.9                | 92.5            | 3.4                | 1.8                | <u>87.7</u>     | 8.3                |

0 h samples were extracted 15 min after spike-in and aliquotation. Deviations >10% are underlined once; deviations >15%, which do not meet FDA recommendations, are underlined twice;  $n = 5$  for each QC and time point.



**Table S15.** Stability of spiked-in itaconate isomers and derivatives in whole blood from donor C at 37 °C.

| Stability<br>in Whole Blood | Exp. Conc.<br>( $\mu$ M) | Mean<br>( $\mu$ M) | Accuracy<br>(%) | Precision<br>(%CV) | Mean<br>( $\mu$ M) | Accuracy<br>(%) | Precision<br>(%CV) | Mean<br>( $\mu$ M) | Accuracy<br>(%) | Precision<br>(%CV) |
|-----------------------------|--------------------------|--------------------|-----------------|--------------------|--------------------|-----------------|--------------------|--------------------|-----------------|--------------------|
|                             |                          | 0 h at 37 °C       |                 |                    | 4 h at 37 °C       |                 |                    | 8 h at 37 °C       |                 |                    |
| Itaconate                   | 0.3                      | 0.3                | 95.6            | 3.6                | 0.3                | 100.8           | 5.5                | 0.3                | 107.9           | 6.6                |
|                             | 3                        | 2.8                | 92.7            | 2.2                | 2.9                | 95.8            | 2.4                | 3.1                | 103.3           | 6.1                |
|                             | 80                       | 71.6               | <u>89.5</u>     | 8.0                | 79.9               | 99.9            | 5.6                | 84.0               | 105.0           | 1.9                |
| Citraconate                 | 0.15                     | 0.1                | 96.8            | 12.5               | 0.1                | 95.3            | <u>94.8</u>        | 0.0                | <u>11.6</u>     | <u>59.9</u>        |
|                             | 3                        | 2.8                | 93.9            | 2.8                | 2.5                | <u>84.7</u>     | 1.3                | 2.4                | <u>80.3</u>     | 8.2                |
|                             | 40                       | 35.4               | <u>88.5</u>     | 8.4                | 39.6               | 99.0            | 5.9                | 40.9               | 102.4           | 3.0                |
| Mesaconate                  | 0.3                      | 0.2                | <u>65.6</u>     | 2.6                | 0.2                | <u>60.9</u>     | 8.7                | 0.2                | <u>55.6</u>     | 4.7                |
|                             | 3                        | 2.0                | <u>68.0</u>     | 2.0                | 1.9                | <u>64.0</u>     | 1.0                | 1.9                | <u>63.1</u>     | 7.2                |
|                             | 80                       | 69.5               | <u>86.8</u>     | 8.4                | 78.6               | 98.2            | 6.2                | 82.1               | 102.6           | 2.1                |
| 4-Octyl-itaconate           | 0.03                     | 0.02               | <u>66.5</u>     | 4.0                | 0.02               | <u>61.2</u>     | 12.6               | 0.02               | <u>51.9</u>     | 5.0                |
|                             | 0.3                      | 0.2                | <u>68.6</u>     | 4.8                | 0.2                | <u>63.1</u>     | 2.7                | 0.2                | <u>57.8</u>     | 9.1                |
|                             | 2                        | 1.7                | <u>85.3</u>     | 8.7                | 1.8                | 92.0            | 4.8                | 1.9                | 94.5            | 2.3                |

0 h samples were extracted 15 min after spike-in and aliquotation. Deviations >10% are underlined once; deviations >15%, which do not meet FDA recommendations, are underlined twice;  $n = 5$  for each QC and time point.

**Table S16.** Stability of spiked-in TCA metabolites in plasma from donor C at RT and 4 °C.

| Stability<br>in Plasma | Exp. Conc.<br>(μM) | Mean<br>(μM) | Accuracy<br>(%) | Precision<br>(%CV) |
|------------------------|--------------------|--------------|-----------------|--------------------|--------------|-----------------|--------------------|--------------|-----------------|--------------------|--------------|-----------------|--------------------|
|                        |                    | 0 h at RT    |                 |                    | 8 h at RT    |                 |                    | 24 h at RT   |                 |                    | 24 h at 4 °C |                 |                    |
| cis-Aconitate          | 0.15               | 0.3          | <u>214.7</u>    | <u>42.4</u>        | 0.7          | <u>444.0</u>    | 11.7               | 0.7          | <u>462.7</u>    | 11.8               | 0.1          | <u>70.7</u>     | <u>153.5</u>       |
|                        | 3                  | 3.0          | 99.0            | 5.3                | 2.2          | <u>71.7</u>     | 7.7                | 2.0          | <u>65.5</u>     | 1.1                | 1.7          | <u>57.4</u>     | <u>16.8</u>        |
|                        | 40                 | 37.3         | 93.3            | 1.8                | 20.0         | <u>50.0</u>     | 3.0                | 16.6         | <u>41.4</u>     | 1.2                | 19.2         | <u>48.0</u>     | 6.4                |
| Citrate                | 1.2                | -4.5         | <u>-376.7</u>   | <u>52.0</u>        | 0.9          | <u>73.3</u>     | <u>152.5</u>       | -0.6         | <u>-46.7</u>    | <u>436.0</u>       | 7.9          | <u>656.7</u>    | <u>56.1</u>        |
|                        | 6                  | 1.8          | <u>30.0</u>     | <u>148.6</u>       | 7.1          | <u>118.7</u>    | <u>101.6</u>       | 0.5          | <u>8.0</u>      | <u>384.2</u>       | 23.0         | <u>384.0</u>    | <u>28.1</u>        |
|                        | 20                 | 10.2         | <u>50.8</u>     | <u>57.9</u>        | 22.9         | <u>114.6</u>    | <u>19.1</u>        | 25.2         | <u>126.2</u>    | <u>16.6</u>        | 40.6         | <u>203.2</u>    | 13.5               |
| Fumarate               | 5                  | 4.3          | <u>85.5</u>     | 9.1                | 2.6          | <u>52.2</u>     | 11.6               | 1.5          | <u>29.6</u>     | <u>29.0</u>        | 2.4          | <u>47.7</u>     | 12.6               |
|                        | 12                 | 12.0         | 100.3           | 5.2                | 8.1          | <u>67.5</u>     | 4.5                | 4.7          | <u>39.6</u>     | 7.0                | 7.8          | <u>65.0</u>     | 10.7               |
|                        | 40                 | 41.3         | 103.2           | 1.2                | 30.3         | <u>75.8</u>     | 4.7                | 21.8         | <u>54.6</u>     | 2.5                | 29.8         | <u>74.6</u>     | 5.2                |
| Isocitrate             | 0.6                | 2.7          | <u>456.7</u>    | <u>44.7</u>        | 6.5          | <u>1090.0</u>   | <u>16.3</u>        | 8.3          | <u>1383.3</u>   | 12.0               | 13.4         | <u>2236.7</u>   | 13.2               |
|                        | 6                  | 26.5         | <u>441.0</u>    | 5.2                | 29.7         | <u>495.0</u>    | 11.9               | 30.9         | <u>515.7</u>    | 3.9                | 44.6         | <u>743.7</u>    | 7.1                |
|                        | 40                 | 155.5        | <u>388.8</u>    | 4.1                | 164.4        | <u>411.0</u>    | 3.1                | 169.1        | <u>422.9</u>    | 2.5                | 206.3        | <u>515.9</u>    | 6.1                |
| Lactate                | 50                 | 57.2         | <u>114.4</u>    | <u>62.5</u>        | 185.2        | <u>370.4</u>    | <u>21.4</u>        | 244.4        | <u>488.8</u>    | <u>18.4</u>        | 285.2        | <u>570.4</u>    | <u>29.1</u>        |
|                        | 150                | 144.8        | 96.5            | <u>30.9</u>        | 275.2        | <u>183.5</u>    | <u>17.6</u>        | 389.2        | <u>259.5</u>    | 14.5               | 504.4        | <u>336.3</u>    | <u>19.3</u>        |
|                        | 400                | 352.4        | <u>88.1</u>     | <u>22.3</u>        | 483.6        | <u>120.9</u>    | 5.8                | 548.0        | <u>137.0</u>    | 8.7                | 703.2        | <u>175.8</u>    | <u>18.0</u>        |
| Malate                 | 0.6                | -1.0         | <u>-162.7</u>   | <u>43.5</u>        | 1.6          | <u>260.7</u>    | <u>30.5</u>        | 5.5          | <u>911.3</u>    | 8.5                | 3.8          | <u>638.7</u>    | <u>15.3</u>        |
|                        | 6                  | 8.2          | <u>136.7</u>    | 10.1               | 13.4         | <u>223.0</u>    | 8.8                | 19.3         | <u>321.0</u>    | 2.1                | 19.5         | <u>324.3</u>    | 11.5               |
|                        | 40                 | 59.7         | <u>149.3</u>    | 3.4                | 70.8         | <u>177.1</u>    | 2.3                | 85.1         | <u>212.9</u>    | 2.1                | 87.6         | <u>219.1</u>    | 6.6                |
| Succinate              | 5                  | 3.1          | <u>61.7</u>     | 9.1                | 2.9          | <u>57.3</u>     | 13.1               | 3.3          | <u>66.6</u>     | 3.3                | 2.7          | <u>54.2</u>     | 7.6                |
|                        | 12                 | 7.0          | <u>58.7</u>     | 3.9                | 6.8          | <u>56.5</u>     | 3.4                | 7.3          | <u>60.9</u>     | 5.8                | 6.7          | <u>56.0</u>     | 4.5                |
|                        | 40                 | 23.1         | <u>57.9</u>     | 3.3                | 22.4         | <u>56.0</u>     | 4.3                | 22.8         | <u>57.0</u>     | 3.7                | 23.1         | <u>57.7</u>     | 1.1                |

0 h samples were extracted 15 min after spike-in and aliquotation. Deviations > 10% are underlined once; deviations > 15%, which do not meet FDA recommendations, are underlined twice; *n* = 5 for each QC and time point.

**Table S17.** Stability of spiked-in TCA metabolites in whole blood from donor C at 37 °C

|                             | Exp. Conc.<br>( $\mu$ M) | Mean<br>( $\mu$ M) | Accuracy<br>(%) | Precision<br>(%CV) | Mean<br>( $\mu$ M) | Accuracy<br>(%) | Precision<br>(%CV) | Mean<br>( $\mu$ M) | Accuracy<br>(%) | Precision<br>(%CV) |
|-----------------------------|--------------------------|--------------------|-----------------|--------------------|--------------------|-----------------|--------------------|--------------------|-----------------|--------------------|
| Stability<br>in Whole Blood |                          | 0 h at 37 °C       |                 |                    | 4 h at 37 °C       |                 |                    | 8 h at 37 °C       |                 |                    |
| cis-Aconitate               | 0.15                     | 0.2                | <u>157.3</u>    | <u>34.6</u>        | 1.3                | <u>868.0</u>    | 11.9               | 1.4                | <u>921.3</u>    | 12.6               |
|                             | 3                        | 2.2                | <u>74.5</u>     | 5.8                | 2.4                | <u>78.6</u>     | 2.9                | 2.5                | <u>83.9</u>     | 8.8                |
|                             | 40                       | 27.8               | <u>69.4</u>     | 6.7                | 18.6               | <u>46.5</u>     | 4.4                | 16.4               | <u>40.9</u>     | 2.3                |
| Citrate                     | 1.2                      | -3.4               | <u>-280.8</u>   | <u>51.7</u>        | -5.9               | <u>-490.8</u>   | <u>33.8</u>        | -7.4               | <u>-617.5</u>   | 11.2               |
|                             | 6                        | -2.1               | <u>-35.5</u>    | <u>103.6</u>       | -3.1               | <u>-50.8</u>    | <u>37.8</u>        | -1.6               | <u>-26.2</u>    | <u>159.2</u>       |
|                             | 20                       | 5.7                | <u>28.8</u>     | <u>103.2</u>       | 15.8               | <u>79.2</u>     | <u>20.4</u>        | 18.4               | 92.0            | 6.5                |
| Fumarate                    | 5                        | 4.9                | 98.5            | <u>20.4</u>        | 6.9                | <u>137.9</u>    | 5.0                | 8.7                | <u>173.1</u>    | 9.9                |
|                             | 12                       | 11.2               | 93.4            | 6.7                | 9.1                | <u>76.0</u>     | 3.5                | 11.3               | 94.3            | 9.2                |
|                             | 40                       | 34.0               | <u>85.1</u>     | 10.5               | 21.9               | <u>54.7</u>     | 7.5                | 23.7               | <u>59.2</u>     | 6.9                |
| Isocitrate                  | 0.6                      | 5.1                | <u>843.3</u>    | <u>31.9</u>        | 16.6               | <u>2763.3</u>   | 9.6                | 19.1               | <u>3183.3</u>   | 4.9                |
|                             | 6                        | 29.3               | <u>487.7</u>    | 8.7                | 45.0               | <u>750.3</u>    | 1.8                | 52.1               | <u>867.7</u>    | 8.3                |
|                             | 40                       | 134.8              | <u>337.0</u>    | 10.1               | 200.5              | <u>501.4</u>    | 5.4                | 234.9              | <u>587.4</u>    | 1.7                |
| Lactate                     | 50                       | 573.6              | <u>1147.2</u>   | 5.8                | 5313.2             | <u>10626.4</u>  | 3.9                | 9025.2             | <u>18050.4</u>  | 3.0                |
|                             | 150                      | 637.6              | <u>425.1</u>    | 10.1               | 5285.2             | <u>3523.5</u>   | 2.5                | 9165.2             | <u>6110.1</u>   | 6.0                |
|                             | 400                      | 825.2              | <u>206.3</u>    | 13.3               | 5697.2             | <u>1424.3</u>   | 5.5                | 9541.2             | <u>2385.3</u>   | 1.4                |
| Malate                      | 0.6                      | 3.9                | <u>646.7</u>    | <u>27.7</u>        | 58.0               | <u>9660.0</u>   | 3.3                | 99.2               | <u>16526.7</u>  | 5.3                |
|                             | 6                        | 11.7               | <u>195.3</u>    | 4.1                | 69.8               | <u>1163.3</u>   | 2.8                | 112.0              | <u>1866.7</u>   | 7.2                |
|                             | 40                       | 64.4               | <u>161.0</u>    | 7.8                | 154.8              | <u>387.0</u>    | 5.1                | 196.4              | <u>491.0</u>    | 1.3                |
| Succinate                   | 5                        | 1.8                | <u>36.6</u>     | 9.0                | 2.8                | <u>55.4</u>     | 11.6               | 4.0                | <u>80.4</u>     | 9.7                |
|                             | 12                       | 5.0                | <u>41.9</u>     | 7.5                | 5.8                | <u>48.0</u>     | 3.8                | 7.3                | <u>60.8</u>     | 7.3                |
|                             | 40                       | 16.8               | <u>42.1</u>     | 9.6                | 20.7               | <u>51.8</u>     | 6.3                | 22.9               | <u>57.3</u>     | 2.2                |

0 h samples were extracted 15 min after spike-in and aliquotation. Deviations > 10% are underlined once; deviations > 15%, which do not meet FDA recommendations, are underlined twice;  $n = 5$  for each QC and time point.

**Table S18.** Accuracy and precision of QC-H dilutions.

|                   | Exp. Conc.<br>( $\mu$ M) | Mean<br>( $\mu$ M)        | Accuracy<br>(%) | Precision<br>(%CV) |
|-------------------|--------------------------|---------------------------|-----------------|--------------------|
|                   | QC-H 1:10                | Diluted Extracted Samples |                 |                    |
| Itaconate         | 8                        | 8.5                       | 106.7           | 1.9                |
| Citraconate       | 4                        | 4.2                       | 105.8           | 1.6                |
| Mesaconate        | 8                        | 8.7                       | 108.9           | 1.9                |
| 4-Octyl-itaconate | 0.2                      | 0.2                       | 109.0           | 2.1                |
| cis-Aconitate     | 4                        | 4.3                       | 106.2           | 1.7                |
| Citrate           | 2                        | 1.9                       | 93.3            | 2.9                |
| Fumarate          | 4                        | 4.4                       | <u>110.2</u>    | 2.6                |
| Isocitrate        | 4                        | 4.8                       | <u>120.9</u>    | 3.6                |
| Lactate           | 40                       | 49.6                      | <u>124.0</u>    | 5.7                |
| Malate            | 4                        | 5.7                       | <u>142.3</u>    | 2.3                |
| Succinate         | 4                        | 4.2                       | 106.1           | 1.8                |

Deviations > 10% are underlined once; deviations > 15%, which do not meet FDA recommendations, are underlined twice;  $n = 5$ .

## References:

- Nguyen, T.V.; Alfaro, A.C.; Merien, F.; Young, T.; Grandiosa, R. Metabolic and immunological responses of male and female new Zealand Greenshell mussels (*Perna canaliculus*) infected with *Vibrio* sp. *J. Invertebr. Pathol.* **2018**, *157*, 80–89, doi:10.1016/j.jip.2018.08.008.
- Aggrey, S.E.; Milfort, M.C.; Fuller, A.L.; Yuan, J.; Rekaya, R. Effect of host genotype and *Eimeria acervulina* infection on the metabolome of meat-type chickens. *PLoS One* **2019**, *14*, e0223417, doi:10.1371/journal.pone.0223417.
- Michopoulos, F.; Karagianni, N.; Whalley, N.M.; Firth, M.A.; Nikolaou, C.; Wilson, I.D.; Critchlow, S.E.; Kollias, G.; Theodoridis, G.A. Targeted Metabolic Profiling of the Tg197 Mouse Model Reveals Itaconic Acid as a Marker of Rheumatoid Arthritis. *J. Proteome Res.* **2016**, *15*, 4579–4590, doi:10.1021/acs.jproteome.6b00654.
- Li, Y.; Liang, L.; Deng, X.; Zhong, L. Lipidomic and metabolomic profiling reveals novel candidate biomarkers in active systemic lupus erythematosus. *Int. J. Clin. Exp. Pathol.* **2019**, *12*, 857–866.
- Mossa, A.H.; Shamout, S.; Cammisotto, P.; Campeau, L. Urinary metabolomics predict the severity of overactive bladder syndrome in an aging female population. *Int. Urogynecol. J.* **2019**, 10.1007/s00192-019-04175-6, doi:10.1007/s00192-019-04175-6.
- Meiser, J.; Kraemer, L.; Jaeger, C.; Madry, H.; Link, A.; Lepper, P.M.; Hiller, K.; Schneider, J.G. Itaconic acid indicates cellular but not systemic immune system activation. *Oncotarget* **2018**, *9*, 32098–32107, doi:10.18632/oncotarget.25956.
- Duran, M.; Bruinvis, L.; Ketting, D.; Wadman, S.K. Deranged isoleucine metabolism during ketotic attacks in patients with methylmalonic acidemia. *J. Inher. Metab. Dis.* **1978**, *1*, 105–107, doi:10.1007/bf01805683.
- Zhu, J.; Djukovic, D.; Deng, L.; Gu, H.; Himmati, F.; Abu Zaid, M.; Chiorean, E.G.; Raftery, D. Targeted serum metabolite profiling and sequential metabolite ratio analysis for colorectal cancer progression monitoring. *Anal. Bioanal. Chem.* **2015**, *407*, 7857–7863, doi:10.1007/s00216-015-8984-8.
- Wang, H.; Zhang, H.; Yao, L.; Cui, L.; Zhang, L.; Gao, B.; Liu, W.; Wu, D.; Chen, M.; Li, X., et al. Serum metabolic profiling of type 2 diabetes mellitus in Chinese adults using an untargeted GC/TOFMS. *Clin. Chim. Acta* **2018**, *477*, 39–47, doi:10.1016/j.cca.2017.11.036.
- Eguchi, A.; Sakurai, K.; Watanabe, M.; Mori, C. Exploration of potential biomarkers and related biological pathways for PCB exposure in maternal and cord serum: A pilot birth cohort study in Chiba, Japan. *Environ. Int.* **2017**, *102*, 157–164, doi:10.1016/j.envint.2017.02.011.
- Hao, J.; Yang, T.; Zhou, Y.; Gao, G.Y.; Xing, F.; Peng, Y.; Tao, Y.Y.; Liu, C.H. Serum Metabolomics Analysis Reveals a Distinct Metabolic Profile of Patients with Primary Biliary Cholangitis. *Sci. Rep.* **2017**, *7*, 784, doi:10.1038/s41598-017-00944-9.
- De Biase, I.; Pasquali, M.; Asamoah, A. Unusual Metabolites in a Patient with Isovaleric Acidemia. *Clin. Chem.* **2019**, *65*, 595–597, doi:10.1373/clinchem.2018.300558.
- Coman, D.; Vissers, L.; Riley, L.G.; Kwint, M.P.; Hauck, R.; Koster, J.; Geuer, S.; Hopkins, S.; Hallinan, B.; Sweetman, L., et al. Squalene Synthase Deficiency: Clinical, Biochemical, and Molecular Characterization of a Defect in Cholesterol Biosynthesis. *Am. J. Hum. Genet.* **2018**, *103*, 125–130, doi:10.1016/j.ajhg.2018.05.004.
- Shin, J.H.; Yang, J.Y.; Jeon, B.Y.; Yoon, Y.J.; Cho, S.N.; Kang, Y.H.; Ryu, D.H.; Hwang, G.S. (1)H NMR-based metabolomic profiling in mice infected with *Mycobacterium tuberculosis*. *J. Proteome Res.* **2011**, *10*, 2238–2247, doi:10.1021/pr101054m.

29. Zhu, X.; Lei, H.; Wu, J.; Li, J.V.; Tang, H.; Wang, Y. Systemic responses of BALB/c mice to *Salmonella typhimurium* infection. *J. Proteome Res.* **2014**, *13*, 4436–4445, doi:10.1021/pr500770x.
52. Beloborodova, N.; Pautova, A.; Sergeev, A.; Fedotcheva, N. Serum Levels of Mitochondrial and Microbial Metabolites Reflect Mitochondrial Dysfunction in Different Stages of Sepsis. *Metabolites* **2019**, *9*, doi:10.3390/metabo9100196.
53. de Seymour, J.V.; Conlon, C.A.; Sulek, K.; Villas Boas, S.G.; McCowan, L.M.; Kenny, L.C.; Baker, P.N. Early pregnancy metabolite profiling discovers a potential biomarker for the subsequent development of gestational diabetes mellitus. *Acta Diabetol* **2014**, *51*, 887–890, doi:10.1007/s00592-014-0626-7.
54. Riquelme, S.A.; Liimatta, K.; Wong Fok Lung, T.; Fields, B.; Ahn, D.; Chen, D.; Lozano, C.; Saenz, Y.; Uhlemann, A.C.; Kahl, B.C., et al. *Pseudomonas aeruginosa* Utilizes Host-Derived Itaconate to Redirect Its Metabolism to Promote Biofilm Formation. *Cell Metab.* **2020**, *31*, 1091–1106 e1096, doi:10.1016/j.cmet.2020.04.017.
55. Van Nguyen, T.; Alfaro, A.C. Targeted metabolomics to investigate antimicrobial activity of itaconic acid in marine molluscs. *Metabolomics* **2019**, *15*, 97, doi:10.1007/s11306-019-1556-8.
56. Shao, C.; Song, J.; Zhao, S.; Jiang, H.; Wang, B.; Chi, A. Therapeutic Effect and Metabolic Mechanism of A Selenium-Polysaccharide from Ziyang Green Tea on Chronic Fatigue Syndrome. *Polymers* **2018**, *10*, doi:10.3390/polym10111269.
57. Weiss, J.M.; Davies, L.C.; Karwan, M.; Ileva, L.; Ozaki, M.K.; Cheng, R.Y.; Ridnour, L.A.; Annunziata, C.M.; Wink, D.A.; McVicar, D.W. Itaconic acid mediates crosstalk between macrophage metabolism and peritoneal tumors. *J. Clin. Invest.* **2018**, *128*, 3794–3805, doi:10.1172/JCI99169.
58. Shi, R.; Zhang, J.; Fang, B.; Tian, X.; Feng, Y.; Cheng, Z.; Fu, Z.; Zhang, J.; Wu, J. Runners' metabolomic changes following marathon. *Nutr. Metab.* **2020**, *17*, 19, doi:10.1186/s12986-020-00436-0.
59. Kalantari, S.; Nafar, M.; Samavat, S.; Parvin, M. 1h NMR-based metabolomics study for identifying urinary biomarkers and perturbed metabolic pathways associated with severity of IgA nephropathy: a pilot study. *Magn. Reson. Chem.* **2017**, *55*, 693–699, doi:10.1002/mrc.4573.
60. Q Wu; X Lai;h Zhao; Z Zhu; Z Hong; Z Guo; Chai, Y. A metabolomics approach for predicting the response to intravenous iron therapy in peritoneal dialysis patients with anemia. *RSC Adv.* **2017**, *7*, 1915–1922.
61. Tasic, L.; Pontes, J.G.M.; Carvalho, M.S.; Cruz, G.; Dal Mas, C.; Sethi, S.; Pedrini, M.; Rizzo, L.B.; Zeni-Graiff, M.; Asevedo, E., et al. Metabolomics and lipidomics analyses by (1)H nuclear magnetic resonance of schizophrenia patient serum reveal potential peripheral biomarkers for diagnosis. *Schizophr. Res.* **2017**, *185*, 182–189, doi:10.1016/j.schres.2016.12.024.
62. Maeda, E.; Matsuo, M.; Saiki, K.; Nakamura, H.; Matsuo, T.; Takemine, H. Methylsuccinate and mesaconate in urine of patients treated with sodium benzoate. *Acta Paediatr. Jpn.* **1989**, *31*, 721–726, doi:10.1111/j.1442-200x.1989.tb01386.x.
63. Shigematsu, Y.; Sudo, M.; Momoi, T.; Inoue, Y.; Suzuki, Y.; Kameyama, J. Changing plasma and urinary organic acid levels in a patient with isovaleric acidemia during an attack. *Pediatr. Res.* **1982**, *16*, 771–775, doi:10.1203/00006450-198209000-00013.
64. Truscott, R.J.; Malegan, D.; McCairns, E.; Burke, D.; Hick, L.; Sims, P.; Halpern, B.; Tanaka, K.; Sweetman, L.; Nyhan, W.L., et al. New metabolites in isovaleric acidemia. *Clin. Chim. Acta* **1981**, *110*, 187–203, doi:10.1016/0009-8981(81)90348-x.
65. Liebich, H.M.; Pickert, A.; Stierle, U.; Woll, J. Gas chromatography-mass spectrometry of saturated and unsaturated dicarboxylic acids in urine. *J. Chromatogr.* **1980**, *199*, 181–189, doi:10.1016/s0021-9673(01)91371-8.
66. Nakamura, E.; Rosenberg, L.E.; Tanaka, K. Microdetermination of methylmalonic acid and other short chain dicarboxylic acids by gas chromatography: use in prenatal diagnosis of methylmalonic acidemia and in studies of isovaleric acidemia. *Clin. Chim. Acta* **1976**, *68*, 127–140, doi:10.1016/0009-8981(76)90412-5.
67. Gao, L.; Yuan, H.; Xu, E.; Liu, J. Toxicology of paraquat and pharmacology of the protective effect of 5-hydroxy-1-methylhydantoin on lung injury caused by paraquat based on metabolomics. *Sci. Rep.* **2020**, *10*, 1790, doi:10.1038/s41598-020-58599-y.
68. Montgomery, J.A.; Mamer, O.A.; Scriver, C.R. Metabolism of ethylmalonate to mesaconate in the rat. Evidence for trans-dehydrogenation of methylsuccinate. *Biochem. J.* **1983**, *214*, 641–644, doi:10.1042/bj2140641.
69. Su, W.; Shi, J.; Zhao, Y.; Yan, F.; Lei, L.; Li, H. *Porphyromonas gingivalis* triggers inflammatory responses in periodontal ligament cells by succinate-succinate dehydrogenase-HIF-1 $\alpha$  axis. *Biochem. Biophys. Res. Commun.* **2020**, *522*, 184–190, doi:10.1016/j.bbrc.2019.11.074.
70. Shigematsu, M.; Tomonaga, S.; Shimokawa, F.; Murakami, M.; Imamura, T.; Matsui, T.; Funaba, M. Regulatory responses of hepatocytes, macrophages and vascular endothelial cells to magnesium deficiency. *J. Nutr. Biochem.* **2018**, *56*, 35–47, doi:10.1016/j.jnutbio.2018.01.008.
